# Supplementary material for: Preparation of quinazolino[3,2-a]quinazolines via a palladium-catalyzed three-component reaction of carbodiimide, isocyanide, and amine
Source: Royal Society of Chemistry journal article supplement (doi:10.1039/c2cc30928a), 2012-01-01

# Preparation of quinazolino[3,2-*a*]quinazolines via a palladium-catalyzed three-component reaction of carbodiimide, isocyanide, and amine

Guanyinsheng Qiu,<sup>a</sup> Yaohua He,<sup>\*,b</sup> and Jie Wu<sup>\*,a,c</sup>

<sup>a</sup> *Department of Chemistry, Fudan University, 220 Handan Road, Shanghai 200433, China*

<sup>b</sup> *Shanghai the 6th People's Hospital, Shanghai Jiaotong University, 600 Yishan Road, Shanghai  
200233, China*

<sup>c</sup> *Key Laboratory of Synthetic Organic Chemistry of Natural Substances, Shanghai Institute of  
Organic Chemistry, Chinese Academy of Sciences, 354 Fenglin Road, Shanghai 200032, China*

jie\_wu@fudan.edu.cn

## Supporting Information

1. General experimental methods (S2).
2. General experimental procedure and characterization data (S2-S10).
3. <sup>1</sup>H and <sup>13</sup>C NMR spectra of compounds **4** and **5** (S11-S46).



## General Materials and Methods:

Unless otherwise stated, all commercial reagents were used as received. All solvents were dried and distilled according to standard procedures. Flash column chromatography was performed using silica gel (60-Å pore size, 32–63µm, standard grade). Analytical thin-layer chromatography was performed using glass plates pre-coated with 0.25 mm 230–400 mesh silica gel impregnated with a fluorescent indicator (254 nm). Thin layer chromatography plates were visualized by exposure to ultraviolet light. Organic solutions were concentrated on rotary evaporators at ~20 Torr at 25–35°C. Nuclear magnetic resonance (NMR) spectra are recorded in parts per million from internal tetramethylsilane on the  $\delta$  scale.  $^1\text{H}$  and  $^{13}\text{C}$  NMR spectra were recorded in  $\text{CDCl}_3$  on a Bruker DRX-400 spectrometer operating at 400 MHz and 100 MHz, respectively. All chemical shift values are quoted in ppm and coupling constants quoted in Hz. High resolution mass spectrometry (HRMS) spectra were obtained on a micrOTOF II Instrument. The carbodiimides **1** were synthesized according to literature method (Zeng, F.; Alper, H. *Org. Lett.* **2010**, *12*, 1188.)

*General procedure of the synthesis of quinazolino[3,2-a]quinazolines and related compounds via a palladium-catalyzed three-component reaction of carbodiimide 1, isocyanide 2, and amine 3*

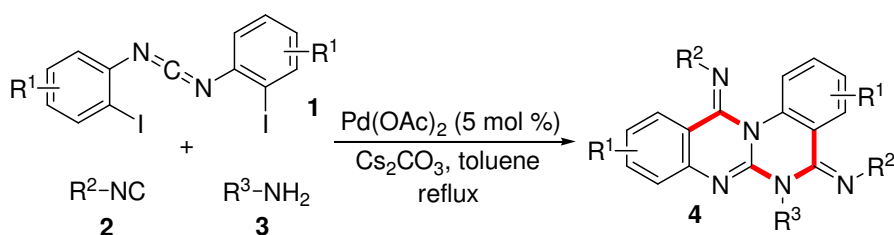

Amine **3** (3.0 equiv) and isocyanide **2** (3.0 equiv) were added to a mixture of carbodiimide **1** (0.2 mmol),  $\text{Pd}(\text{OAc})_2$  (5 mol %), and  $\text{Cs}_2\text{CO}_3$  (3.0 equiv) in toluene (3.0 mL). The mixture was stirred at reflux under  $\text{N}_2$ . After completion of reaction as indicated by TLC (4–12 hrs), the solvent was evaporated and the residue was purified on silica gel to provide the desired product **4**.



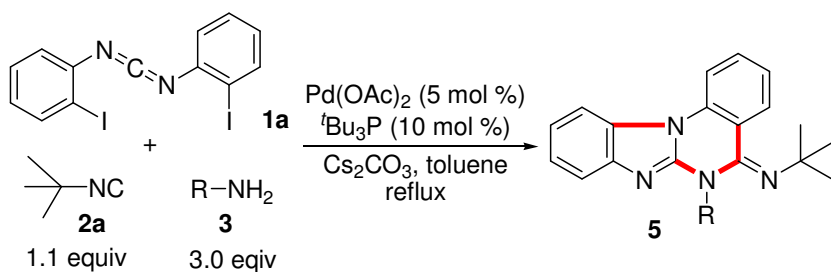

Amine **3** (3.0 equiv) and isocyanide **2** (1.1 equiv) were added to a mixture of carbodiimide **1** (0.2 mmol), Pd(OAc)<sub>2</sub> (5 mol %), *P*<sup>*t*</sup>Bu<sub>3</sub> (10 mol %), and Cs<sub>2</sub>CO<sub>3</sub> (3.0 equiv) in toluene (3.0 mL). The mixture was stirred at reflux under N<sub>2</sub>. After completion of reaction as indicated by TLC (4-12 hrs), the solvent was evaporated and the residue was purified on silica gel to provide the desired product **5**.

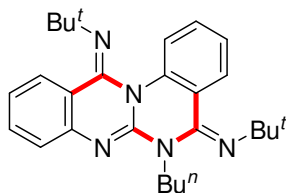

6-Butyl-5,12-bis-*tert*-butylimino-6,12-dihydro-5*H*-quinazolino[3,2-*a*]quinazoline (**4a**). <sup>1</sup>H NMR (400 MHz, CDCl<sub>3</sub>) δ 0.91 (t, *J* = 7.2 Hz, 3H), 1.20 (s, 9H), 1.28-1.31 (m, 2H), 1.40 (s, 9H), 1.65-1.69 (m, 2H), 4.18-4.21 (m, 2H), 7.04-7.18 (m, 2H), 7.20-7.29 (m, 2H), 7.32-7.36 (m, 2H), 7.58 (d, *J* = 7.6 Hz, 1H), 7.90 (d, *J* = 7.6 Hz, 1H); <sup>13</sup>C NMR (100 MHz, CDCl<sub>3</sub>) δ 13.9, 20.2, 29.7, 29.9, 31.9, 43.5, 54.6, 56.3, 118.9, 122.5, 122.7, 124.0, 125.3, 128.3, 129.7, 130.6, 140.4, 142.8, 146.1, 147.4; HRMS Calcd for C<sub>27</sub>H<sub>36</sub>N<sub>5</sub><sup>+</sup> (ESI, M+H<sup>+</sup>): 430.2965; found: 430.2956.

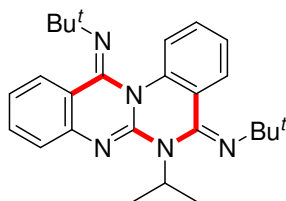

5,12-Bis-*tert*-butylimino-6-isopropyl-6,12-dihydro-5*H*-quinazolino[3,2-*a*]quinazoline (**4b**). <sup>1</sup>H NMR (400 MHz, CDCl<sub>3</sub>) δ 1.20 (s, 9H), 1.39 (s, 9H), 1.52 (d, *J* = 6.0 Hz, 6H), 5.06-5.09 (m, 1H), 7.05-7.10 (m, 2H), 7.17-7.22 (m, 2H), 7.24-7.30 (m, 2H), 7.58 (d, *J* = 7.6 Hz, 1H), 7.91 (d, *J* = 7.6 Hz, 1H); <sup>13</sup>C NMR (100 MHz, CDCl<sub>3</sub>) δ



20.4, 29.3, 31.8, 48.5, 55.1, 56.1, 119.0, 122.3, 122.7, 123.9, 125.2, 128.4, 128.6, 129.3, 130.6, 133.6, 133.8, 140.7, 142.8, 146.1, 147.6; HRMS Calcd for  $C_{26}H_{34}N_5^+$  (ESI,  $M+H^+$ ): 416.2809; found: 416.2808.

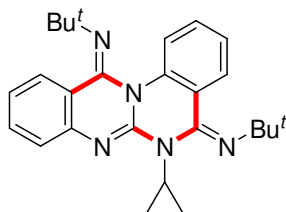

5,12-Bis-*tert*-butylimino-6-cyclopropyl-6,12-dihydro-5*H*-quinazolino[3,2-*a*]quinazoline (**4c**).  $^1H$  NMR (400 MHz,  $CDCl_3$ )  $\delta$  0.55-0.57 (m, 2H), 1.02-1.05 (m, 2H), 1.19 (s, 9H), 1.48 (s, 9H), 3.06-3.07 (m, 1H), 7.08-7.12 (m, 3H), 7.25-7.31 (m, 2H), 7.36-7.39 (m, 1H), 7.53 (d,  $J = 8.0$  Hz, 1H), 7.89 (d,  $J = 7.6$  Hz, 1H);  $^{13}C$  NMR (100 MHz,  $CDCl_3$ )  $\delta$  10.9, 30.2, 31.5, 55.3, 56.1, 119.05, 122.8, 123.6, 124.4, 125.0, 125.8, 126.3, 129.2, 130.7, 138.8, 139.5, 143.7, 146.2; HRMS Calcd for  $C_{26}H_{32}N_5^+$  (ESI,  $M+H^+$ ): 414.2658; found: 414.2647.

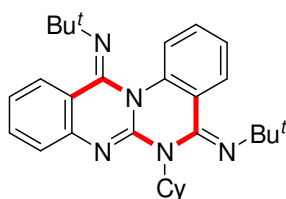

5,12-Bis-*tert*-butylimino-6-cyclohexyl-6,12-dihydro-5*H*-quinazolino[3,2-*a*]quinazoline (**4d**).  $^1H$  NMR (400 MHz,  $CDCl_3$ )  $\delta$  1.19 (s, 9H), 1.39 (s, 9H), 1.66-1.82 (m, 8H), 2.43-2.48 (m, 2H), 4.63-4.68 (m, 1H), 7.02-7.06 (m, 2H), 7.18-7.23 (m, 4H), 7.48 (d,  $J = 7.6$  Hz, 1H), 7.91 (d,  $J = 7.6$  Hz, 1H);  $^{13}C$  NMR (100 MHz,  $CDCl_3$ )  $\delta$  25.4, 26.1, 26.6, 29.9, 31.8, 48.5, 55.1, 56.1, 57.2, 119.0, 122.3, 122.7, 123.9, 124.8, 125.2, 128.4, 129.3, 130.6, 133.6, 133.8, 140.7, 142.8, 146.1, 147.6; HRMS Calcd for  $C_{29}H_{38}N_5^+$  (ESI,  $M+H^+$ ): 456.3122; found: 456.3113.

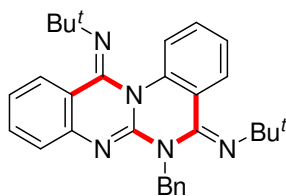



6-Benzyl-5,12-bis-*tert*-butylimino-6,12-dihydro-5*H*-quinazolino[3,2-*a*]quinazoline (**4e**). <sup>1</sup>H NMR (400 MHz, CDCl<sub>3</sub>) δ 1.20 (s, 9H), 1.39 (s, 9H), 5.45 (s, 2H), 7.05-7.08 (m, 2H), 7.14-7.19 (m, 3H), 7.21-7.35 (m, 6H), 7.50 (d, *J* = 7.6 Hz, 1H), 7.91 (d, *J* = 7.6 Hz, 1H); <sup>13</sup>C NMR (100 MHz, CDCl<sub>3</sub>) δ 29.9, 31.8, 46.4, 54.6, 56.3, 119.1, 122.7, 122.8, 123.0, 124.1, 125.3, 126.3, 127.8, 128.2, 128.5, 129.9, 130.6, 133.6, 133.8, 139.2, 140.3, 142.1, 146.1, 147.3; HRMS Calcd for C<sub>30</sub>H<sub>34</sub>N<sub>5</sub><sup>+</sup> (ESI, M+H<sup>+</sup>): 464.2809; found: 464.2826.

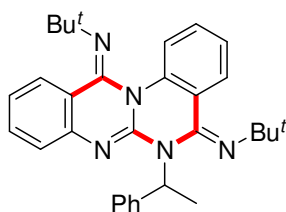

5,12-Bis-*tert*-butylimino-6-(1-phenyl-ethyl)-6,12-dihydro-5*H*-quinazolino[3,2-*a*]quinazoline (**4f**). <sup>1</sup>H NMR (400 MHz, CDCl<sub>3</sub>) δ 1.09 (s, 9H), 1.21 (s, 9H), 1.96 (d, *J* = 6.0 Hz, 3H), 6.21-6.26 (m, 1H), 7.03-7.28 (m, 12H), 7.93 (d, *J* = 8.0 Hz, 1H); <sup>13</sup>C NMR (100 MHz, CDCl<sub>3</sub>) δ 17.1, 29.9, 31.2, 53.8, 54.5, 56.3, 118.9, 122.8, 124.1, 125.2, 125.8, 127.3, 127.5, 128.4, 128.5, 128.7, 129.5, 130.6, 133.6, 133.8, 139.2, 140.6, 141.4, 146.1, 147.3; HRMS Calcd for C<sub>31</sub>H<sub>36</sub>N<sub>5</sub><sup>+</sup> (ESI, M+H<sup>+</sup>): 478.2965; found: 478.2962.

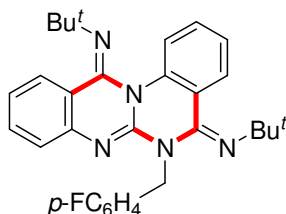

5,12-Bis-*tert*-butylimino-6-(4-fluoro-benzyl)-6,12-dihydro-5*H*-quinazolino[3,2-*a*]quinazoline (**4g**). <sup>1</sup>H NMR (400 MHz, CDCl<sub>3</sub>) δ 1.22 (s, 9H), 1.34 (s, 9H), 5.39 (s, 2H), 6.88-6.92 (m, 2H), 7.06-7.10 (m, 2H), 7.20 (d, *J* = 8.0 Hz, 1H), 7.25-7.35 (m, 5H), 7.50 (d, *J* = 7.2 Hz, 1H), 7.90 (d, *J* = 7.2 Hz, 1H); <sup>13</sup>C NMR (100 MHz, CDCl<sub>3</sub>) δ 29.9, 31.8, 45.7, 54.7, 56.3, 114.5 (d, <sup>2</sup>*J*<sub>CF</sub> = 21 Hz), 119.0, 122.8, 124.1, 125.4, 128.6, 129.9, 130.0, 130.1, 130.7, 134.9, 139.2, 140.3, 142.1, 145.7, 147.2, 161.5 (d, <sup>1</sup>*J*<sub>CF</sub> = 248 Hz); HRMS Calcd for C<sub>30</sub>H<sub>33</sub>N<sub>5</sub><sup>+</sup> (ESI, M+H<sup>+</sup>): 482.2714; found: 482.2693.



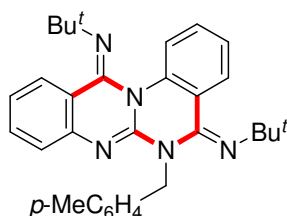

5,12-Bis-*tert*-butylimino-6-(4-methyl-benzyl)-6,12-dihydro-5*H*-quinazolino[3,2-*a*]quinazoline (**4h**).  $^1\text{H}$  NMR (400 MHz,  $\text{CDCl}_3$ )  $\delta$  1.21 (s, 9H), 1.34 (s, 9H), 2.26 (s, 3H), 5.41 (s, 2H), 7.00-7.06 (m, 4H), 7.18-7.32 (m, 6H), 7.50 (d,  $J = 8.0$  Hz, 1H), 7.90 (d,  $J = 7.6$  Hz, 1H);  $^{13}\text{C}$  NMR (100 MHz,  $\text{CDCl}_3$ )  $\delta$  21.1, 29.9, 31.8, 46.1, 54.6, 56.3, 118.9, 122.6, 122.7, 123.1, 124.1, 125.3, 127.8, 128.3, 128.5, 129.1, 129.8, 135.8, 136.1, 140.3, 142.2, 145.8, 147.2; HRMS Calcd for  $\text{C}_{31}\text{H}_{36}\text{N}_5^+$  (ESI,  $\text{M}+\text{H}^+$ ): 478.2965; found: 478.2936.

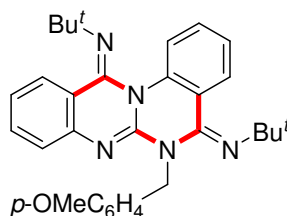

5,12-Bis-*tert*-butylimino-6-(4-methoxy-benzyl)-6,12-dihydro-5*H*-quinazolino[3,2-*a*]quinazoline (**4i**).  $^1\text{H}$  NMR (400 MHz,  $\text{CDCl}_3$ )  $\delta$  1.21 (s, 9H), 1.36 (s, 9H), 3.74 (s, 3H), 5.38 (s, 2H), 6.75 (d,  $J = 7.6$  Hz, 2H), 7.05-7.08 (m, 2H), 7.20-7.35 (m, 6H), 7.50 (d,  $J = 8.0$  Hz, 1H), 7.90 (d,  $J = 7.6$  Hz, 1H);  $^{13}\text{C}$  NMR (100 MHz,  $\text{CDCl}_3$ )  $\delta$  29.9, 31.8, 45.7, 54.6, 55.1, 56.3, 113.2, 113.9, 118.9, 122.6, 122.7, 123.1, 124.1, 125.3, 128.5, 129.2, 129.8, 130.6, 131.4, 140.3, 142.3, 145.9, 147.2; HRMS Calcd for  $\text{C}_{31}\text{H}_{36}\text{N}_5\text{O}^+$  (ESI,  $\text{M}+\text{H}^+$ ): 494.2914; found: 494.2928.

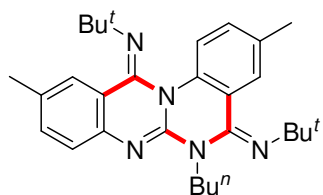

6-Butyl-5,12-bis-*tert*-butylimino-3,10-dimethyl-6,12-dihydro-5*H*-quinazolino[3,2-*a*]quinazoline (**4j**).  $^1\text{H}$  NMR (400 MHz,  $\text{CDCl}_3$ )  $\delta$  0.91 (t,  $J = 7.2$  Hz, 3H), 1.19 (s, 9H), 1.25-1.30 (m, 2H), 1.40 (s, 9H), 1.63-1.67 (m, 2H), 2.34 (s, 3H), 2.37 (s, 3H), 4.17 (t,  $J = 6.8$  Hz, 2H), 7.15-7.17 (m, 4H), 7.36 (s, 1H), 7.71 (s, 1H);  $^{13}\text{C}$  NMR (100 MHz,



CDCl<sub>3</sub>)  $\delta$  13.9, 20.2, 21.0, 29.9, 31.9, 34.3, 43.4, 50.9, 54.6, 56.2, 118.7, 119.1, 123.8, 125.0, 1257.4, 128.4, 130.3, 131.6, 132.0, 132.2, 133.9, 139.7, 143.1, 143.7, 146.9; HRMS Calcd for C<sub>29</sub>H<sub>40</sub>N<sub>5</sub><sup>+</sup> (ESI, M+H<sup>+</sup>): 458.3278; found: 458.3272.

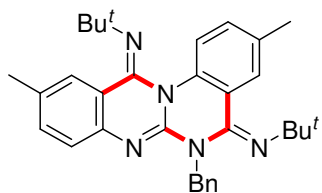

6-Benzyl-5,12-bis-*tert*-butylimino-3,10-dimethyl-6,12-dihydro-5*H*-quinazolino[3,2-*a*]quinazoline (**4k**). <sup>1</sup>H NMR (400 MHz, CDCl<sub>3</sub>)  $\delta$  1.210 (s, 9H), 1.32 (s, 9H), 2.31 (s, 3H), 2.36 (s, 3H), 5.42 (s, 2H), 7.08-7.15 (m, 7H), 7.19-7.22 (m, 2H), 7.32 (s, 1H), 7.71 (s, 1H); <sup>13</sup>C NMR (100 MHz, CDCl<sub>3</sub>)  $\delta$  21.0, 29.9, 31.8, 46.4, 54.5, 56.3, 118.8, 123.1, 124.0, 125.03, 126.3, 127.8, 128.2, 128.5, 128.7, 130.5, 131.6, 132.2, 132.3, 138.1, 139.4, 142.3, 143.5, 147.0; HRMS Calcd for C<sub>32</sub>H<sub>38</sub>N<sub>5</sub><sup>+</sup> (ESI, M+H<sup>+</sup>): 492.3122; found: 492.3098.

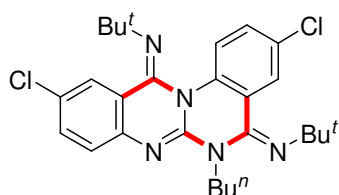

6-Butyl-5,12-bis-*tert*-butylimino-3,10-dichloro-6,12-dihydro-5*H*-quinazolino[3,2-*a*]quinazoline (**4l**). <sup>1</sup>H NMR (400 MHz, CDCl<sub>3</sub>)  $\delta$  0.92 (t, *J* = 7.6 Hz, 3H), 1.19 (s, 9H), 1.25-1.28 (m, 2H), 1.40 (s, 9H), 1.64-1.697 (m, 2H), 4.14 (t, *J* = 7.2 Hz, 2H), 7.11-7.17 (m, 2H), 7.27-7.32 (m, 2H), 7.55 (s, 1H), 7.86 (s, 1H); <sup>13</sup>C NMR (100 MHz, CDCl<sub>3</sub>)  $\delta$  13.9, 20.1, 29.8, 30.1, 31.8, 43.9, 54.9, 56.6, 120.1, 124.9, 125.6, 125.7, 127.8, 128.3, 129.8, 130.1, 130.8, 138.7, 141.2, 144.5, 146.9; HRMS Calcd for C<sub>27</sub>H<sub>34</sub>Cl<sub>2</sub>N<sub>5</sub><sup>+</sup> (ESI, M+H<sup>+</sup>): 498.2186; found: 498.2159.

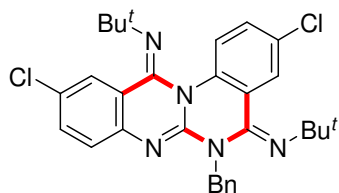



6-Benzyl-5,12-bis-*tert*-butylimino-3,10-dichloro-6,12-dihydro-5*H*-quinazolino[3,2-*a*]quinazoline (**4m**). <sup>1</sup>H NMR (400 MHz, CDCl<sub>3</sub>) δ 1.21 (s, 9H), 1.38 (s, 9H), 5.39 (s, 2H), 7.11-7.32 (m, 9H), 7.46 (s, 1H), 7.86 (s, 1H); <sup>13</sup>C NMR (100 MHz, CDCl<sub>3</sub>) δ 29.8, 31.8, 46.7, 54.9, 56.6, 120.2, 125.0, 125.7, 126.6, 127.9, 128.1, 128.2, 128.4, 128.5, 128.7, 129.9, 130.9, 133.6, 133.8, 138.7, 140.5, 144.2, 147.1; HRMS Calcd for C<sub>30</sub>H<sub>32</sub>Cl<sub>2</sub>N<sub>5</sub><sup>+</sup> (ESI, M+H<sup>+</sup>): 532.2029; found: 532.2027.

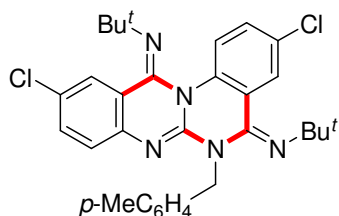

5,12-Bis-*tert*-butylimino-3,10-dichloro-6-(4-methyl-benzyl)-6,12-dihydro-5*H*-quinazolino[3,2-*a*]quinazoline (**4n**). <sup>1</sup>H NMR (400 MHz, CDCl<sub>3</sub>) δ 1.21 (s, 9H), 1.35 (s, 9H), 2.28 (s, 3H), 5.35 (s, 2H), 7.04 (d, *J* = 7.6 Hz, 2H), 7.11-7.18 (m, 6H), 7.46 (s, 1H), 7.85 (s, 1H); <sup>13</sup>C NMR (100 MHz, CDCl<sub>3</sub>) δ 21.1, 29.8, 31.8, 46.3, 54.9, 56.6, 117.4, 120.2, 121.2, 125.0, 125.7, 127.1, 127.4, 128.3, 128.6, 129.5, 129.9, 130.8, 131.6, 135.6, 136.2, 138.7, 141.2, 147.1; HRMS Calcd for C<sub>31</sub>H<sub>34</sub>Cl<sub>2</sub>N<sub>5</sub><sup>+</sup> (ESI, M+H<sup>+</sup>): 546.2186; found: 546.2166.

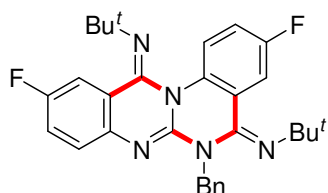

6-Benzyl-5,12-bis-*tert*-butylimino-3,10-difluoro-6,12-dihydro-5*H*-quinazolino[3,2-*a*]quinazoline (**4o**). <sup>1</sup>H NMR (400 MHz, CDCl<sub>3</sub>) δ 1.20 (s, 9H), 1.33 (s, 9H), 5.39 (s, 2H), 7.03-7.07 (m, 2H), 7.14-7.20 (m, 5H), 7.29-7.33 (m, 3H), 7.58-7.61 (m, 1H); <sup>13</sup>C NMR (100 MHz, CDCl<sub>3</sub>) δ 29.8, 31.7, 46.7, 54.8, 56.5, 111.1 (d, <sup>2</sup>*J*<sub>CF</sub> = 23 Hz), 115.0 (d, <sup>2</sup>*J*<sub>CF</sub> = 25 Hz), 117.1 (d, <sup>2</sup>*J*<sub>CF</sub> = 23 Hz), 118.2 (d, <sup>2</sup>*J*<sub>CF</sub> = 23 Hz), 120.5 (d, <sup>3</sup>*J*<sub>CF</sub> = 8 Hz), 125.7, 126.6, 128.1, 128.5, 128.7, 133.6, 133.8, 136.5, 137.1, 138.9, 140.8, 146.7, 157.8 (d, <sup>1</sup>*J*<sub>CF</sub> = 243 Hz), 159.1 (d, <sup>1</sup>*J*<sub>CF</sub> = 242 Hz); HRMS Calcd for C<sub>30</sub>H<sub>32</sub>F<sub>2</sub>N<sub>5</sub><sup>+</sup> (ESI, M+H<sup>+</sup>): 500.2626; found: 500.2594.



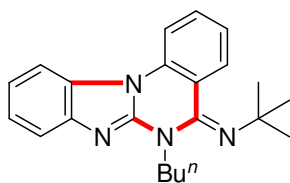

*tert*-Butyl-(6-butyl-6*H*-6,7,11*b*-triazabenzoc[*c*]fluoren-5-ylidene)-amine (**5a**).  $^1\text{H}$  NMR (400 MHz,  $\text{CDCl}_3$ )  $\delta$  0.98 (t,  $J = 7.2$  Hz, 3H), 1.41-1.45 (m, 2H), 1.64 (s, 9H), 1.81-1.85 (m, 2H), 2.38-2.41 (s, 1H), 4.15-4.18 (m, 1H), 7.08-7.19 (m, 3H), 7.25-7.30 (m, 1H), 7.41-7.48 (m, 2H), 8.17 (d,  $J = 8.0$  Hz, 1H), 8.83 (d,  $J = 7.6$  Hz, 1H);  $^{13}\text{C}$  NMR (100 MHz,  $\text{CDCl}_3$ )  $\delta$  13.8, 20.1, 30.1, 31.7, 41.3, 53.6, 107.0, 116.1, 116.7, 119.9, 120.7, 123.7, 125.5, 127.9, 130.3, 131.4, 132.0, 140.9, 148.2, 150.1; HRMS Calcd for  $\text{C}_{22}\text{H}_{27}\text{N}_4^+$  (ESI,  $\text{M}+\text{H}^+$ ): 347.2230; found: 347.2213.

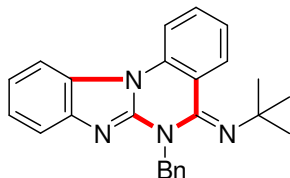

(6-Benzyl-6*H*-6,7,11*b*-triazabenzoc[*c*]fluoren-5-ylidene)-*tert*-butyl-amine (**5b**).  $^1\text{H}$  NMR (400 MHz,  $\text{CDCl}_3$ )  $\delta$  1.65 (s, 9H), 5.39 (s, 2H), 7.00 (d,  $J = 7.6$  Hz, 1H), 7.11-7.21 (m, 3H), 7.25-7.31 (m, 3H), 7.36-7.37 (m, 2H), 7.41-7.48 (m, 2H), 8.19 (d,  $J = 8.0$  Hz, 1H), 8.83 (d,  $J = 7.6$  Hz, 1H);  $^{13}\text{C}$  NMR (100 MHz,  $\text{CDCl}_3$ )  $\delta$  31.7, 45.1, 53.7, 107.7, 116.0, 116.7, 120.2, 121.1, 123.9, 125.6, 127.4, 127.7, 128.1, 128.7, 130.4, 131.5, 131.8, 135.9, 141.6, 148.6; HRMS Calcd for  $\text{C}_{25}\text{H}_{25}\text{N}_4^+$  (ESI,  $\text{M}+\text{H}^+$ ): 381.2074; found: 381.2086.

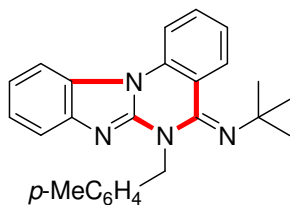

*tert*-Butyl-[6-(4-methylbenzyl)-6*H*-6,7,11*b*-triazabenzoc[*c*]fluoren-5-ylidene]-amine (**5c**).  $^1\text{H}$  NMR (400 MHz,  $\text{CDCl}_3$ )  $\delta$  1.65 (s, 9H), 2.34 (s, 3H), 5.35 (s, 2H), 7.00-7.25 (m, 8H), 7.41-7.48 (m, 2H), 8.19 (d,  $J = 7.2$  Hz, 1H), 8.83 (d,  $J = 6.8$  Hz, 1H);  $^{13}\text{C}$  NMR (100 MHz,  $\text{CDCl}_3$ )  $\delta$  21.1, 31.7, 44.8, 53.5, 107.7, 116.7, 120.2, 121.0, 123.8,



125.6, 127.4, 129.4, 130.4, 131.5, 131.8, 132.9, 137.4, 141.6, 148.9; HRMS Calcd for  $C_{26}H_{27}N_4^+$  (ESI,  $M+H^+$ ): 395.2230; found: 395.2221.



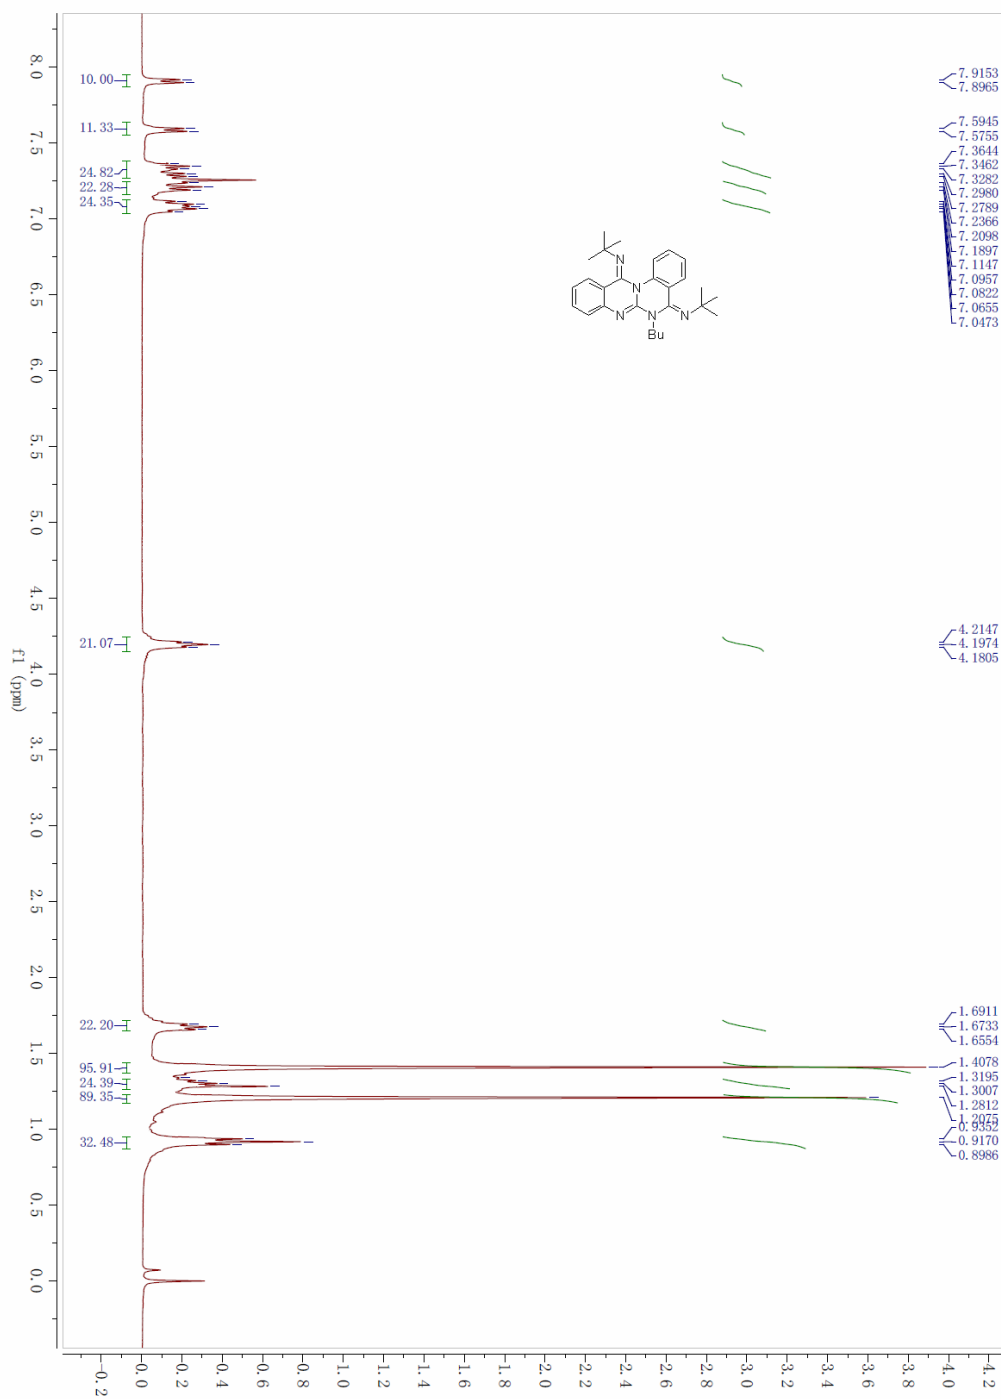



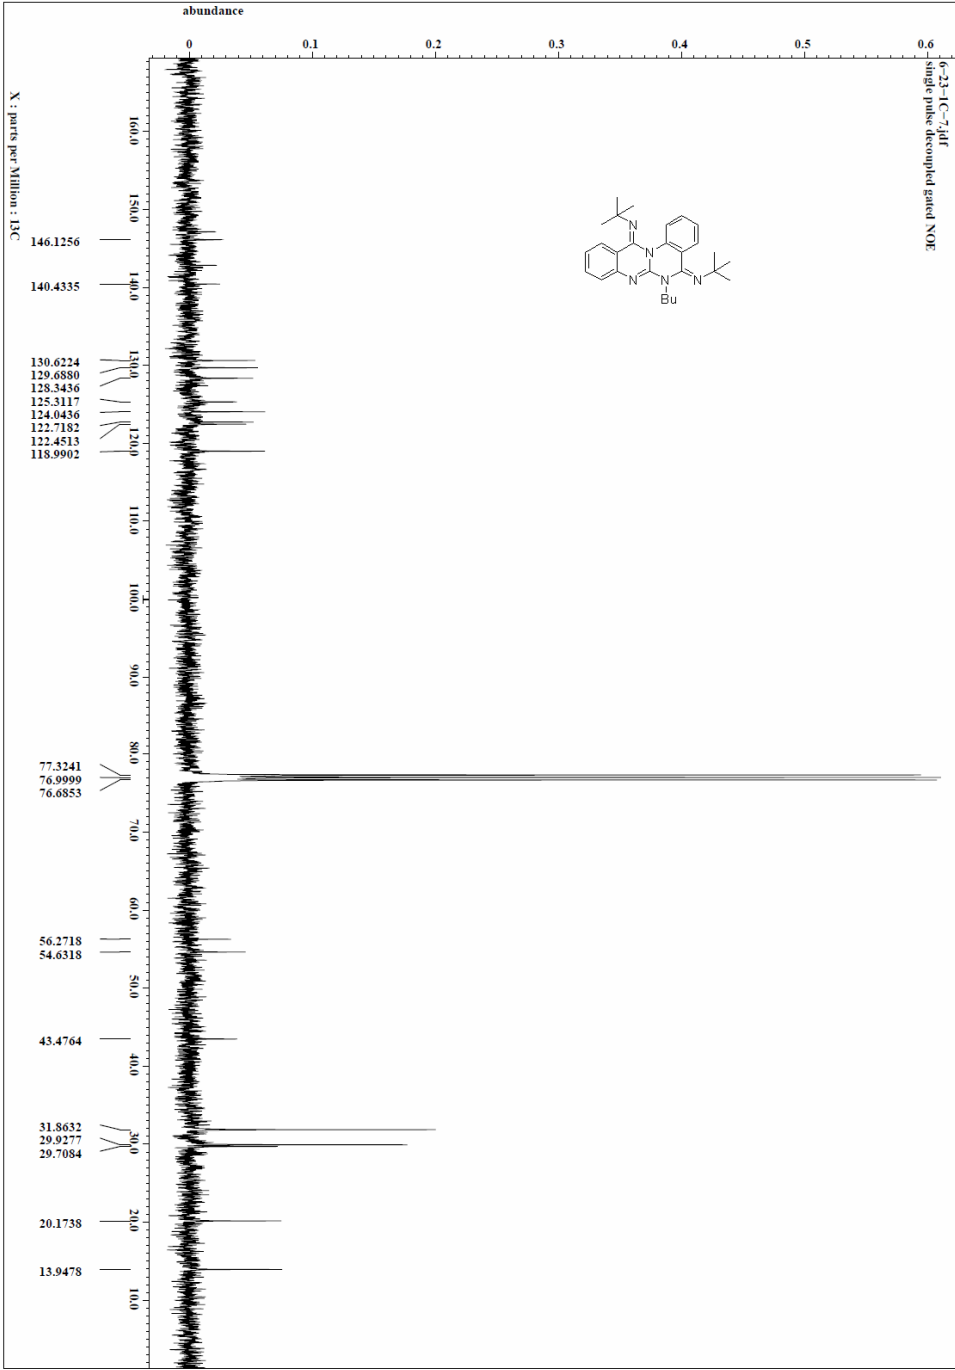



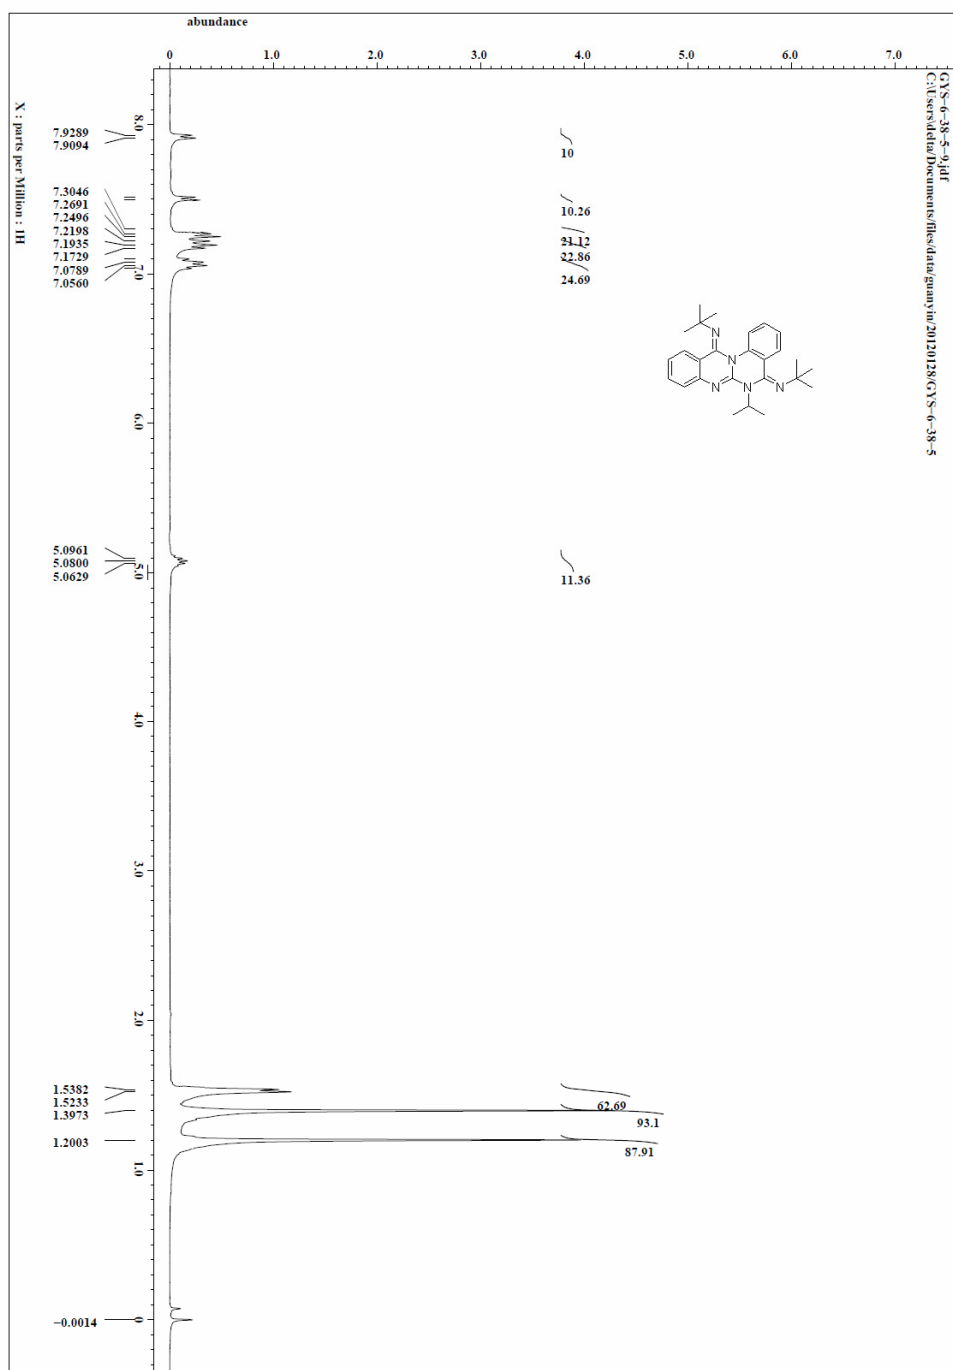



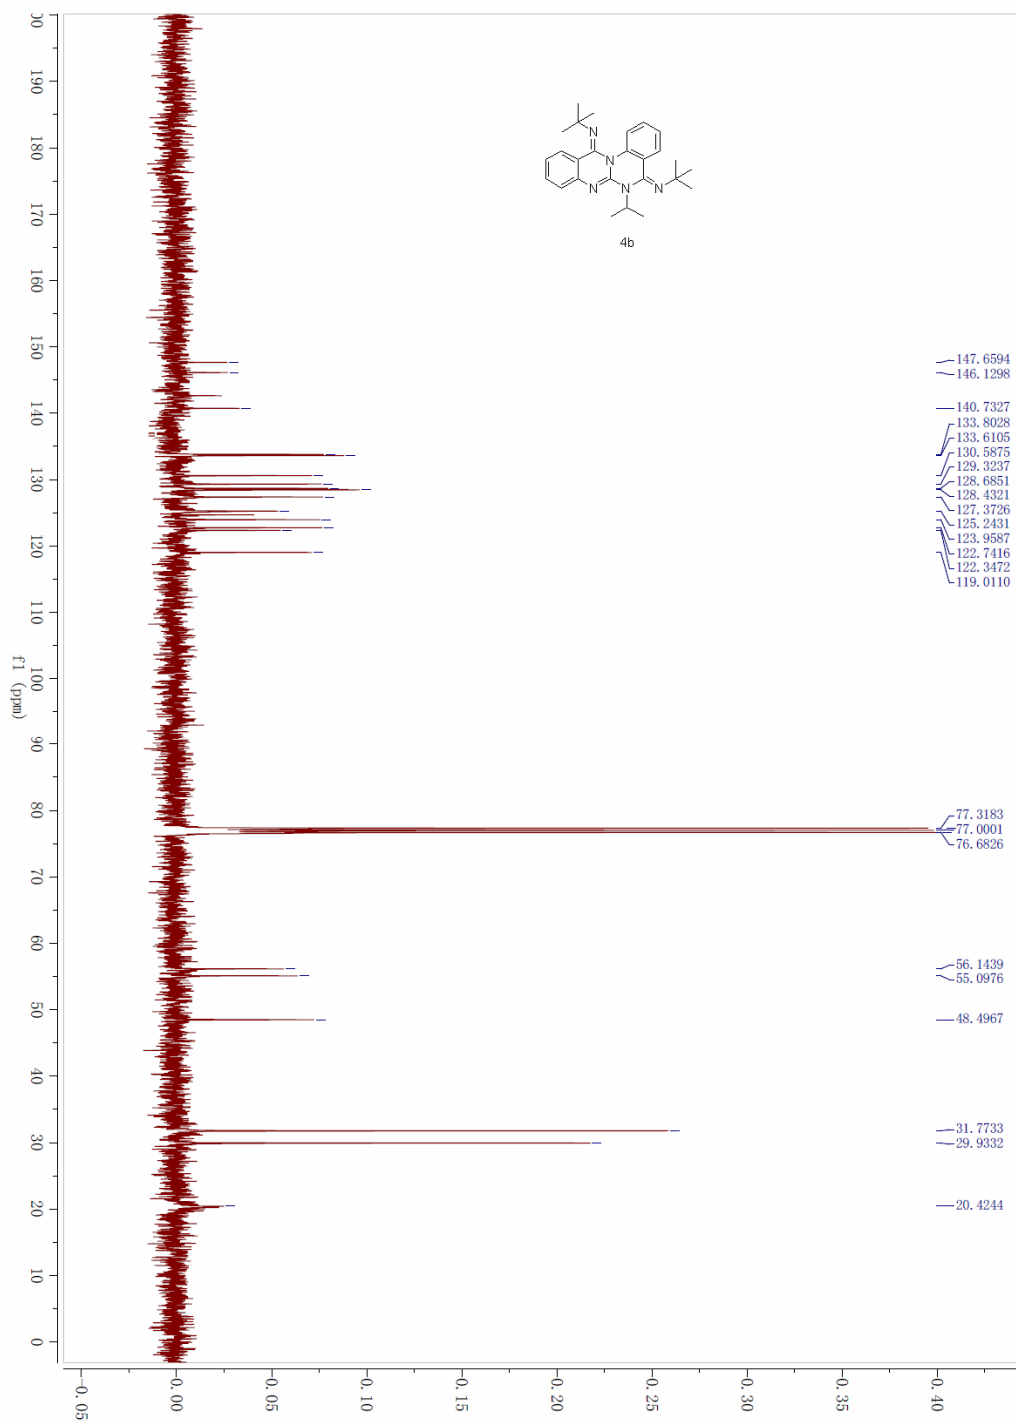



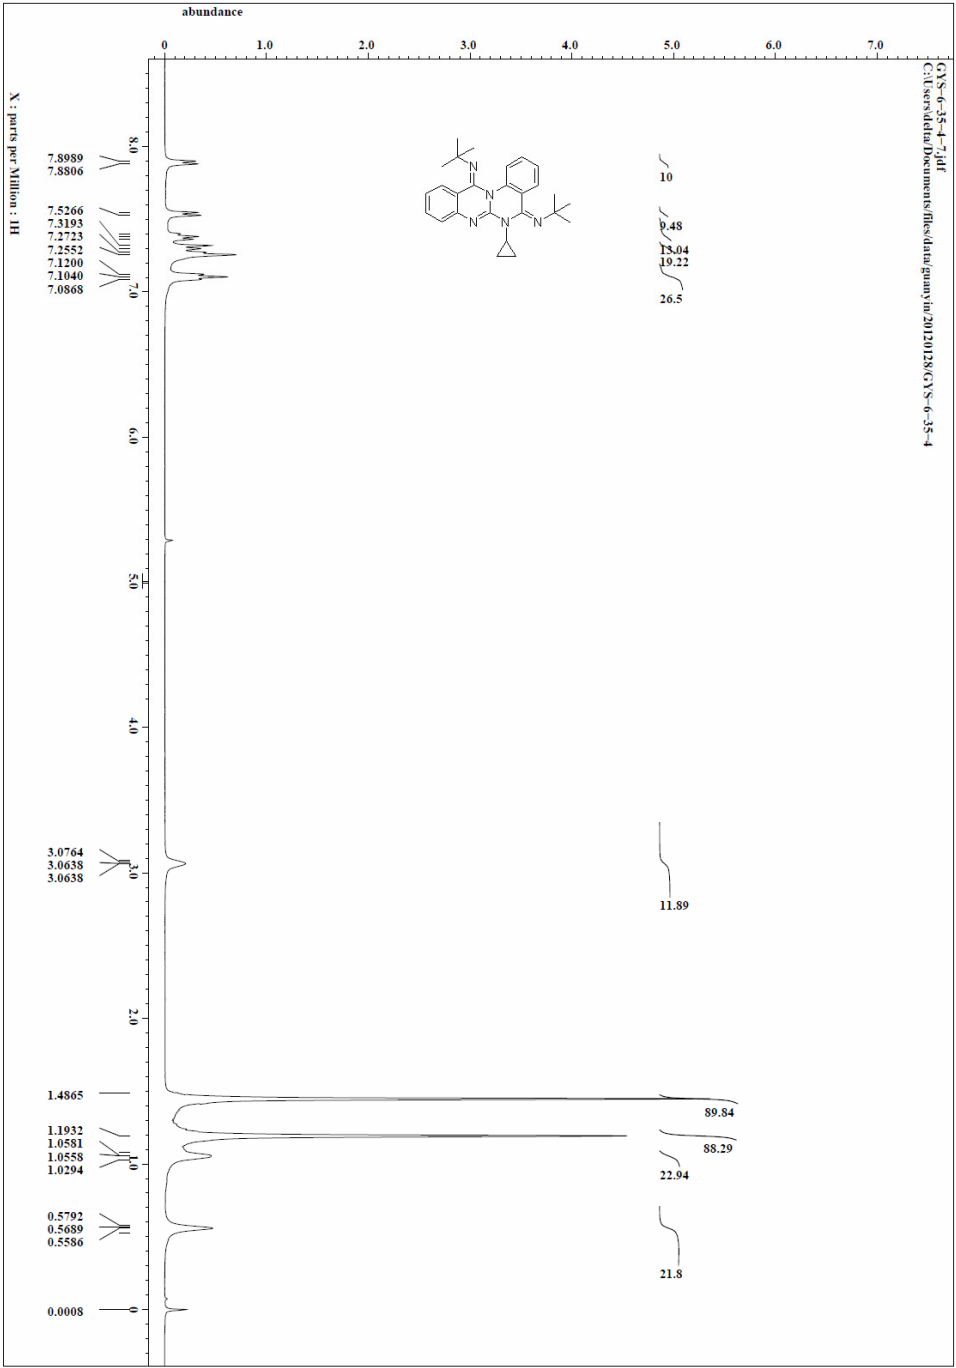



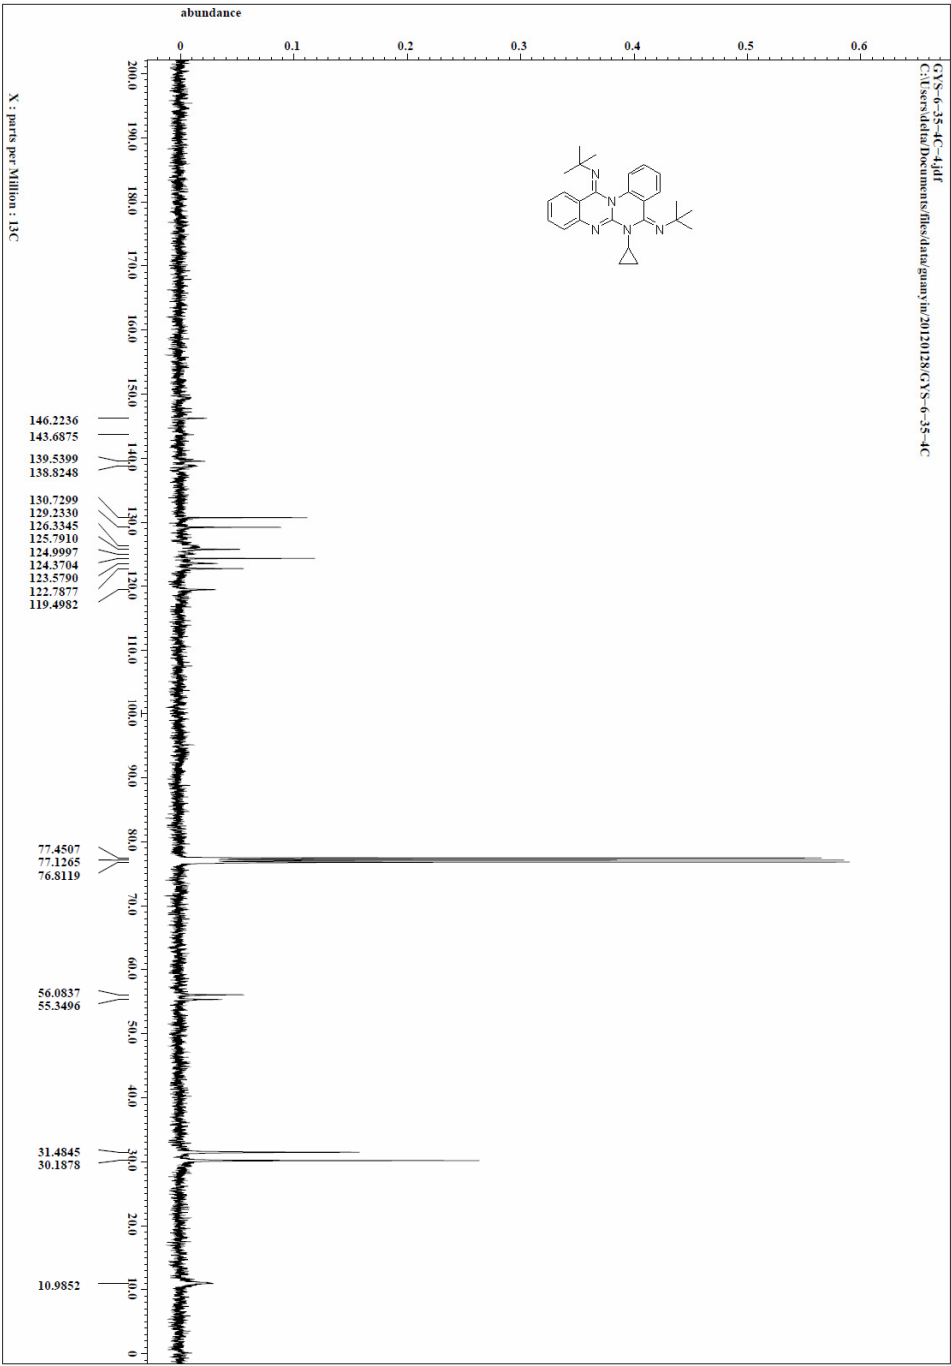



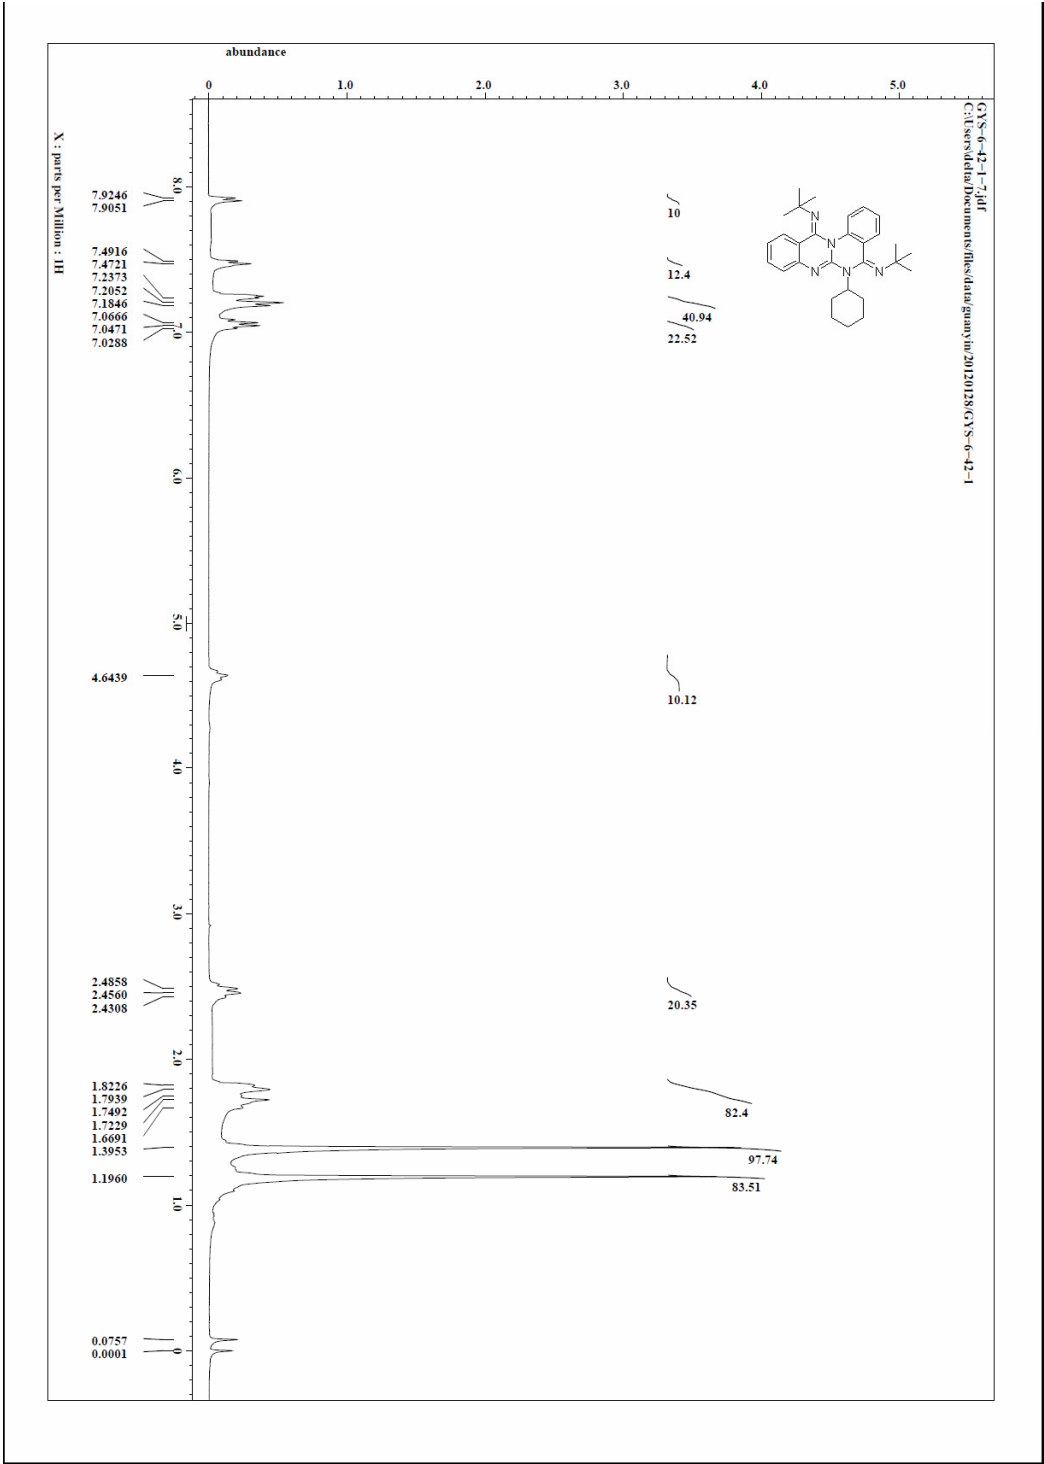



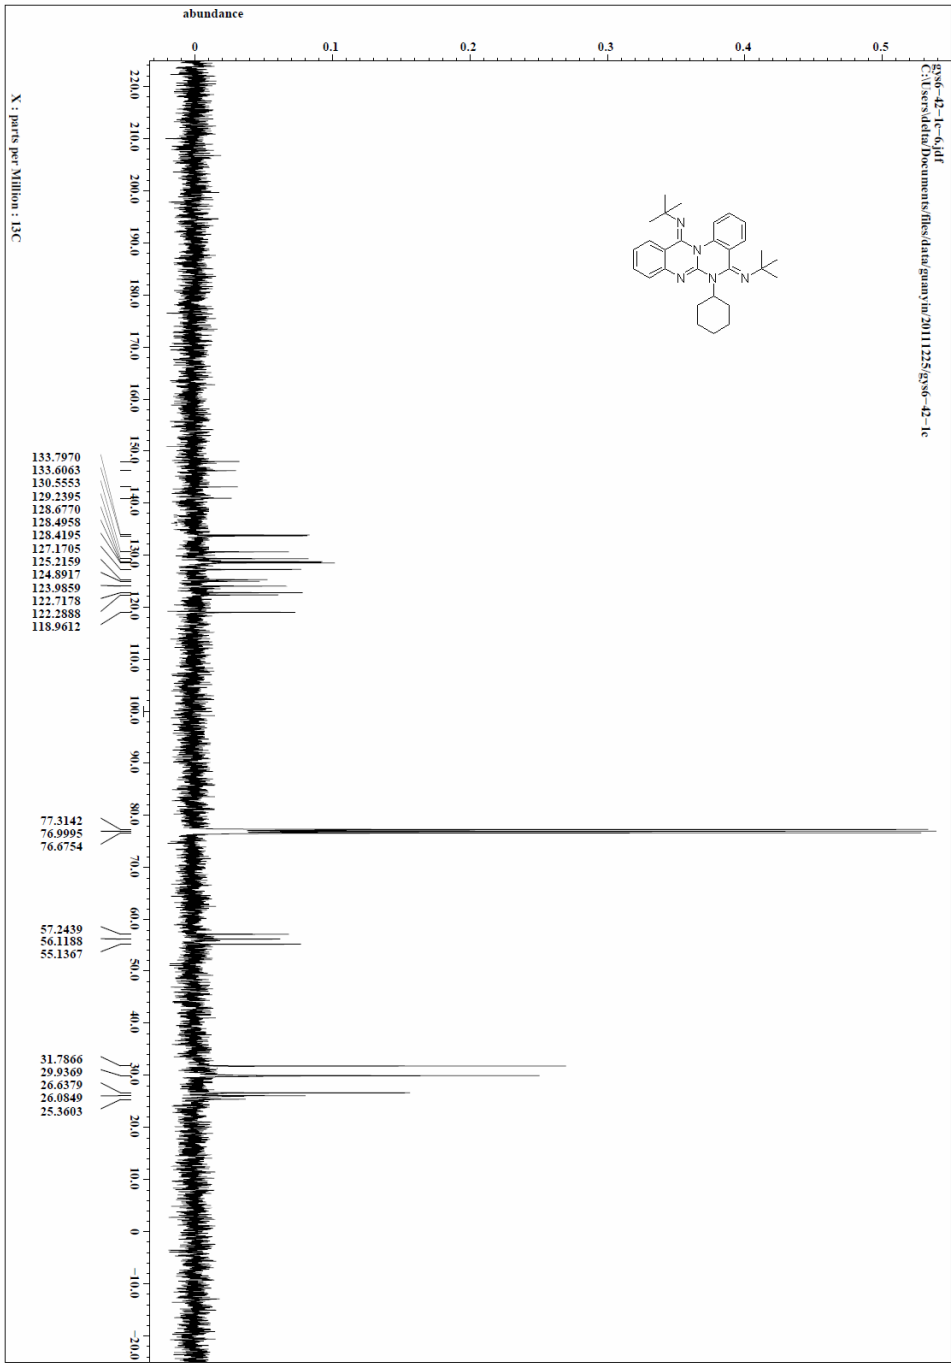



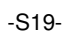



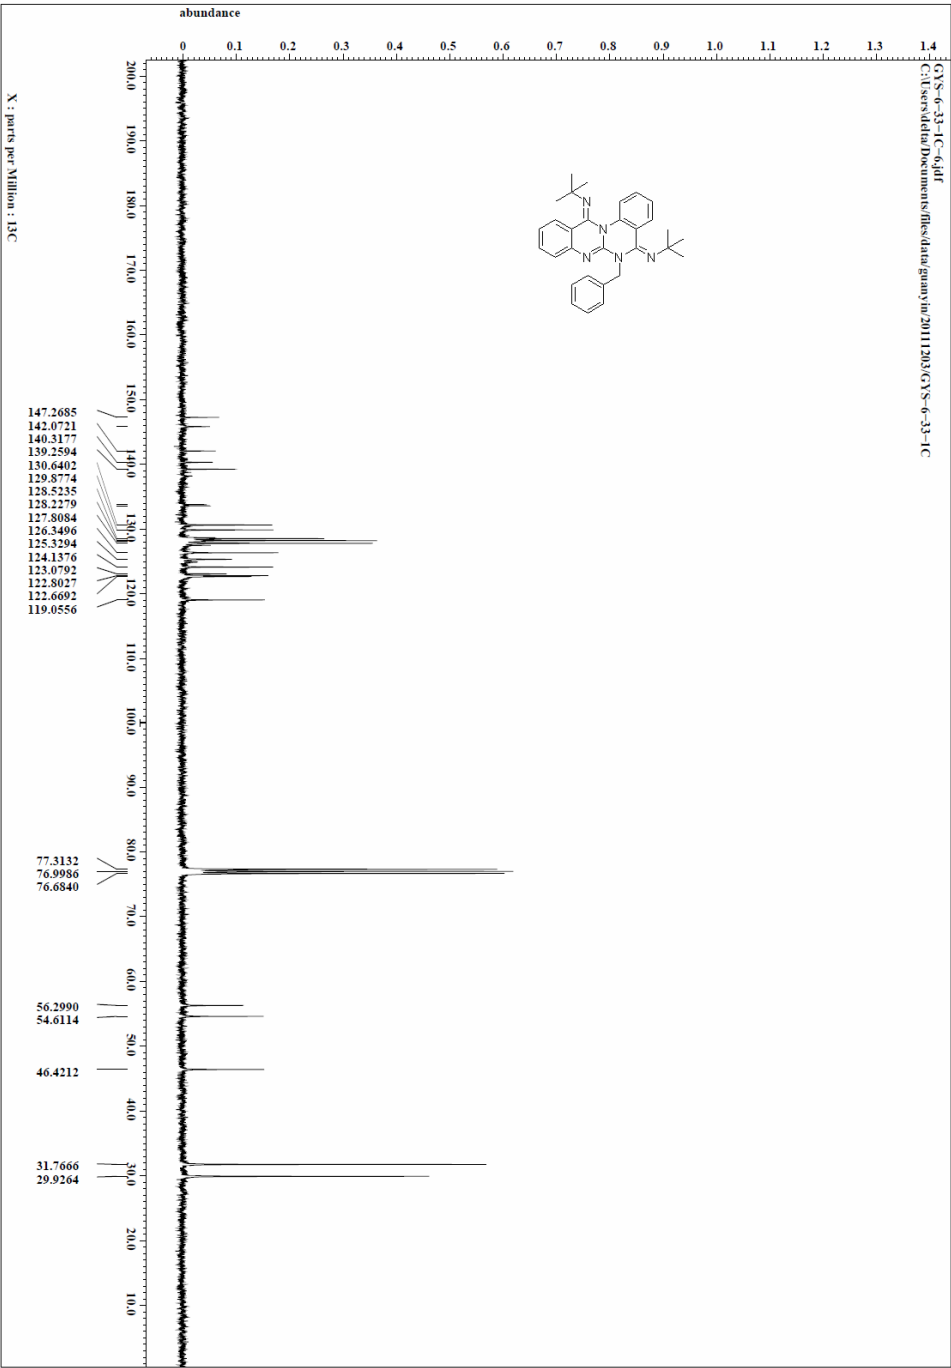



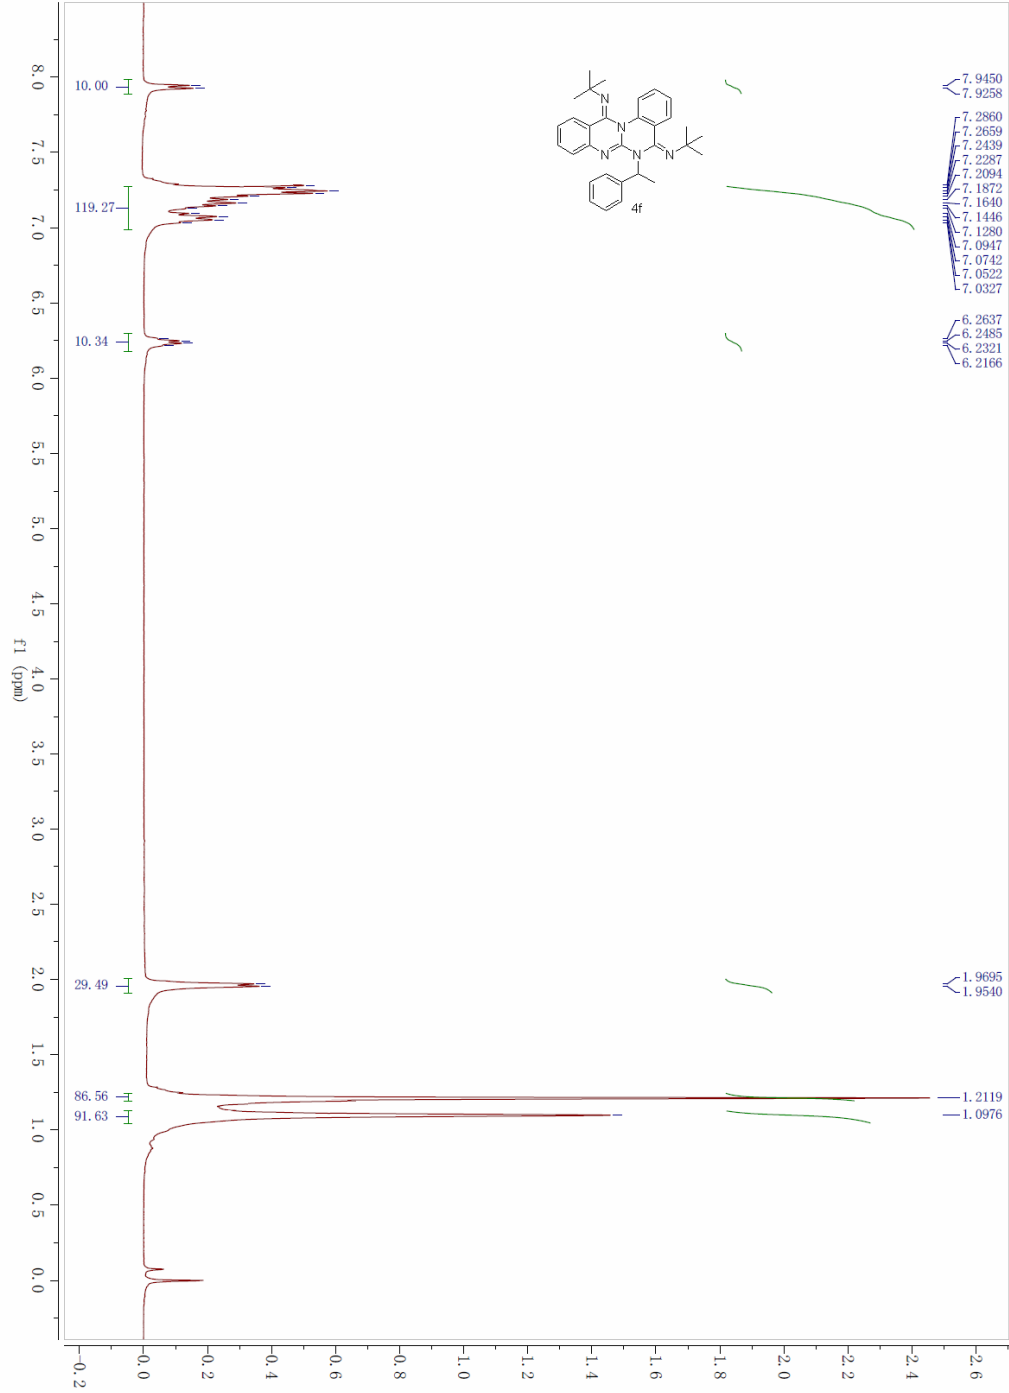



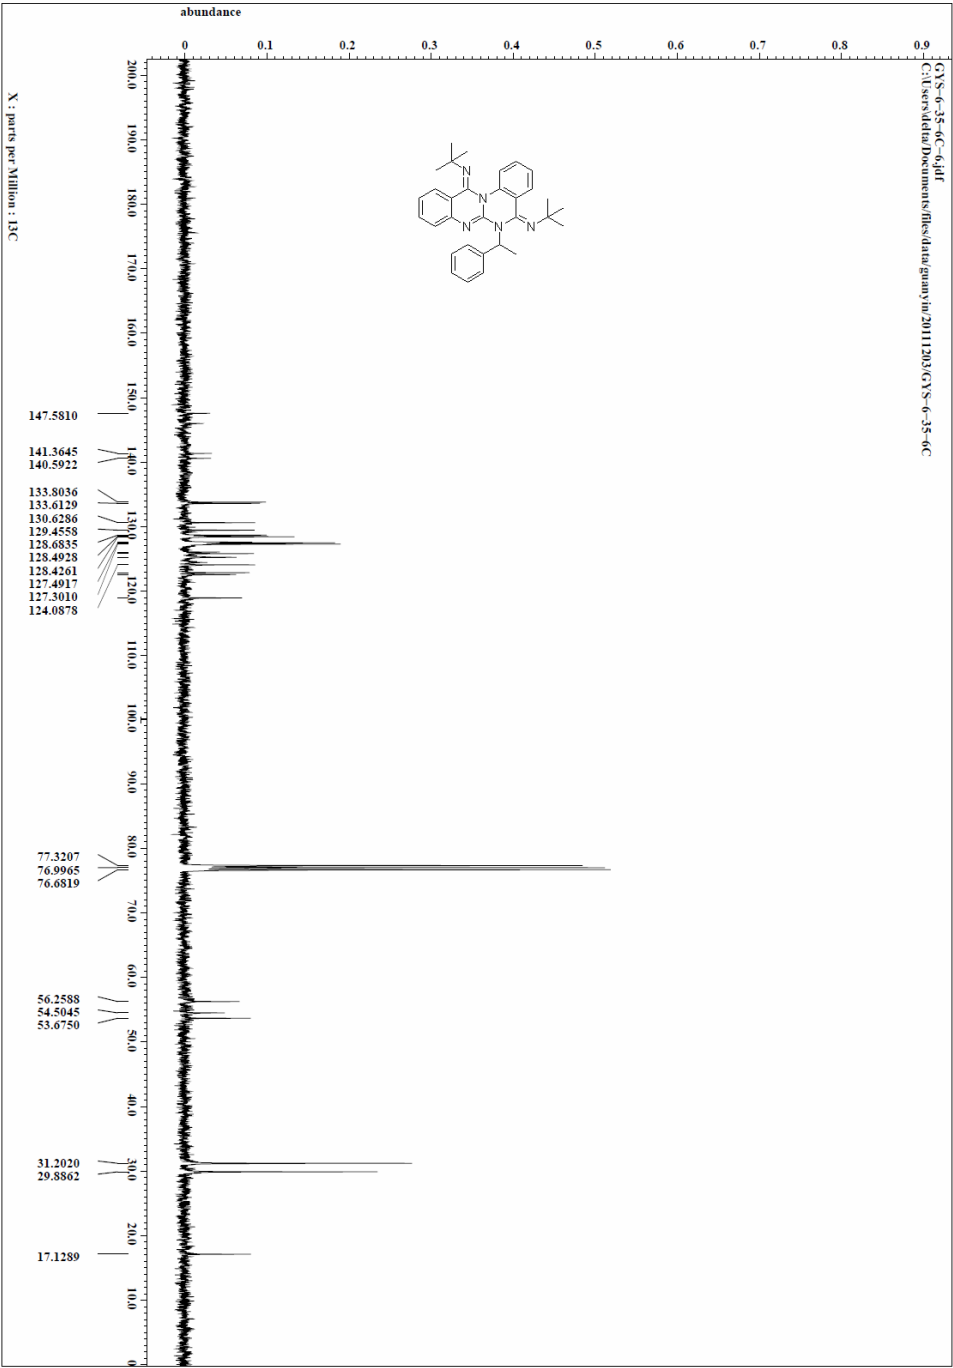



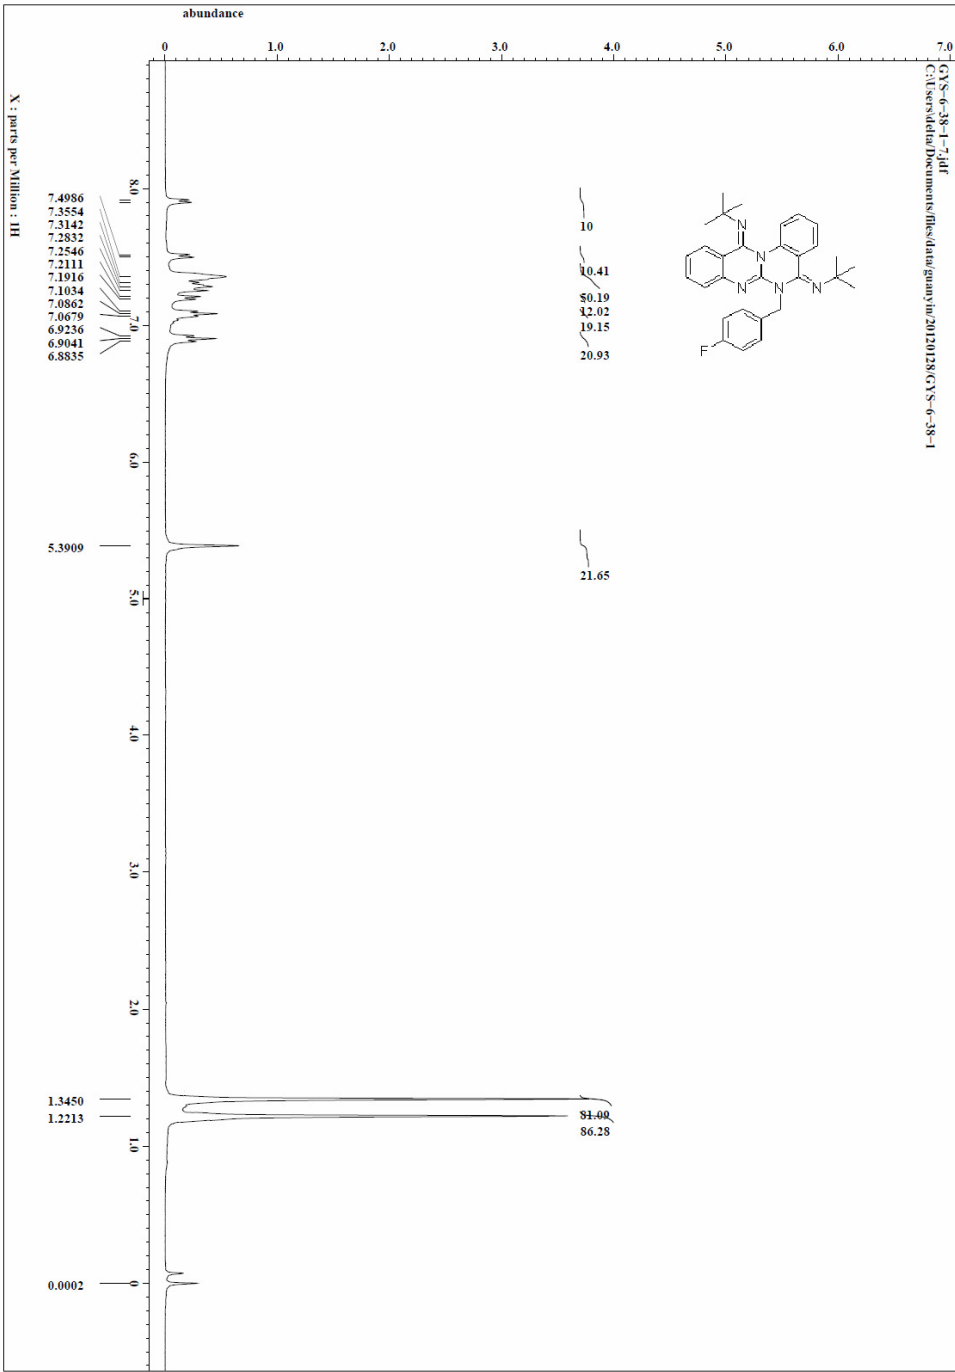



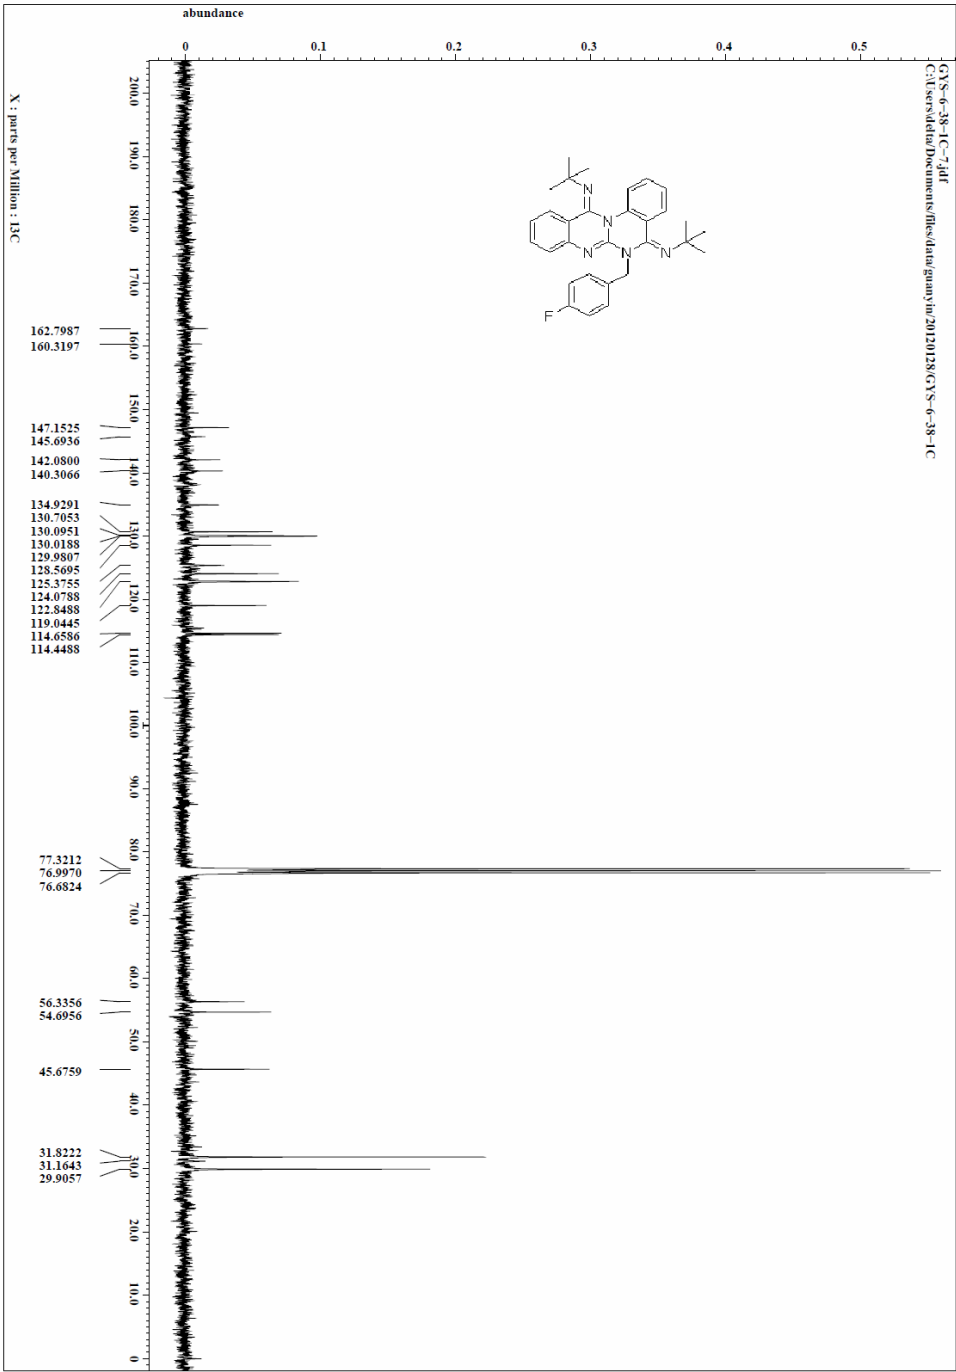



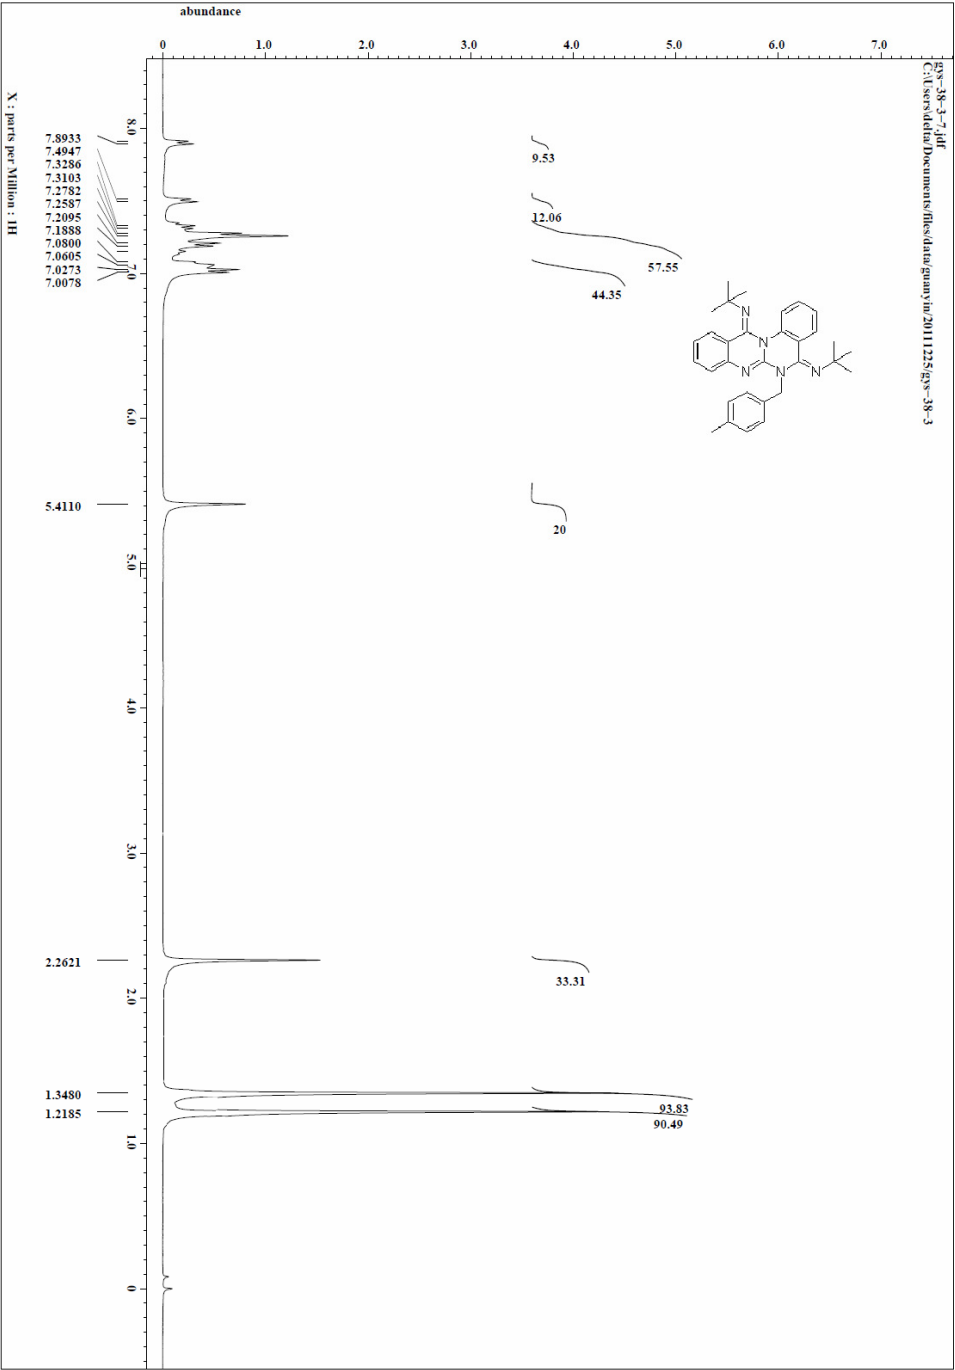



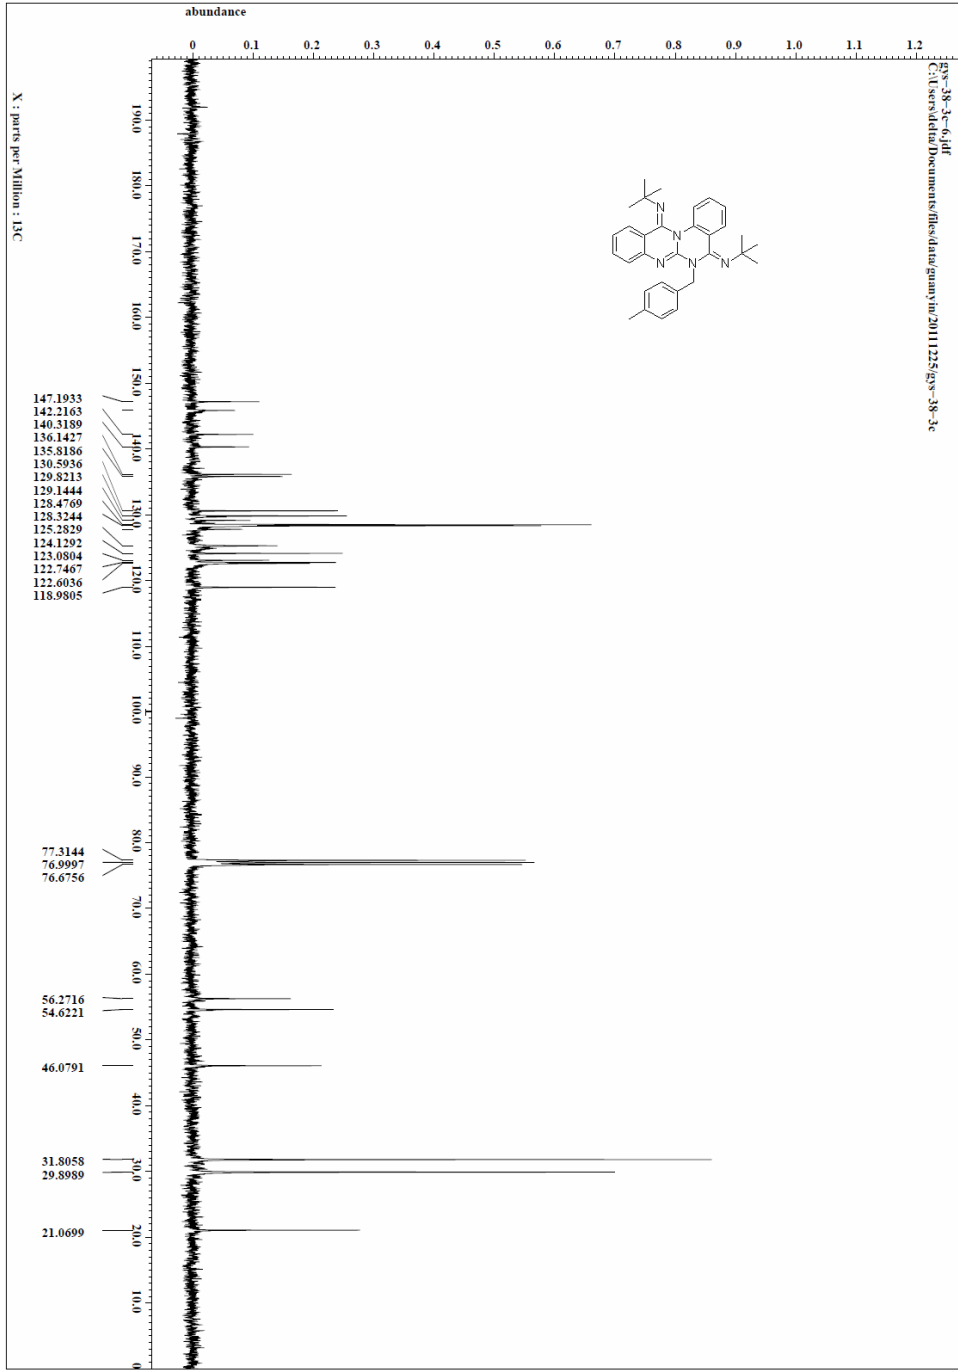



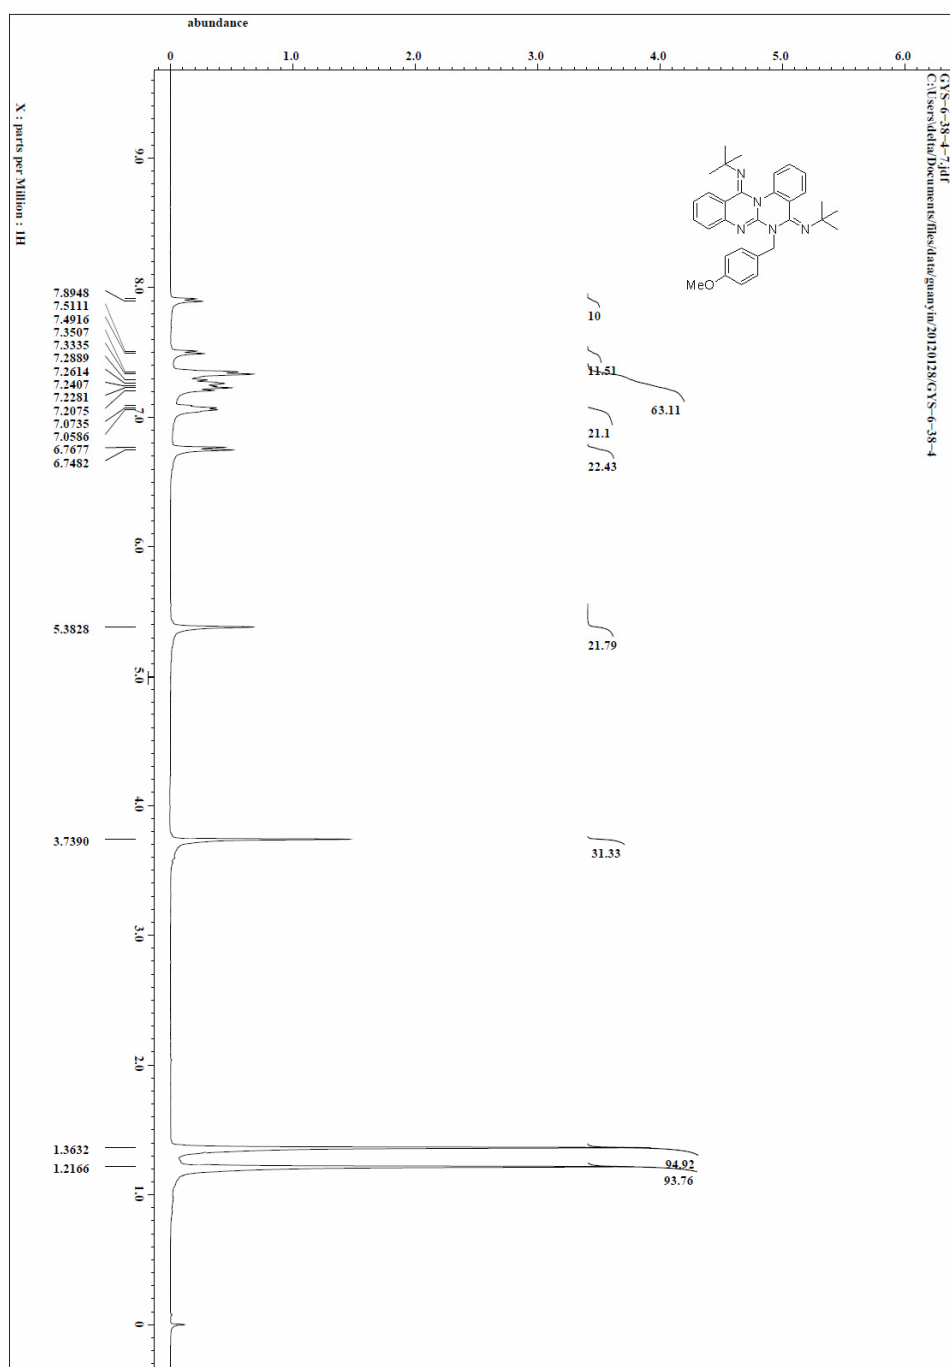



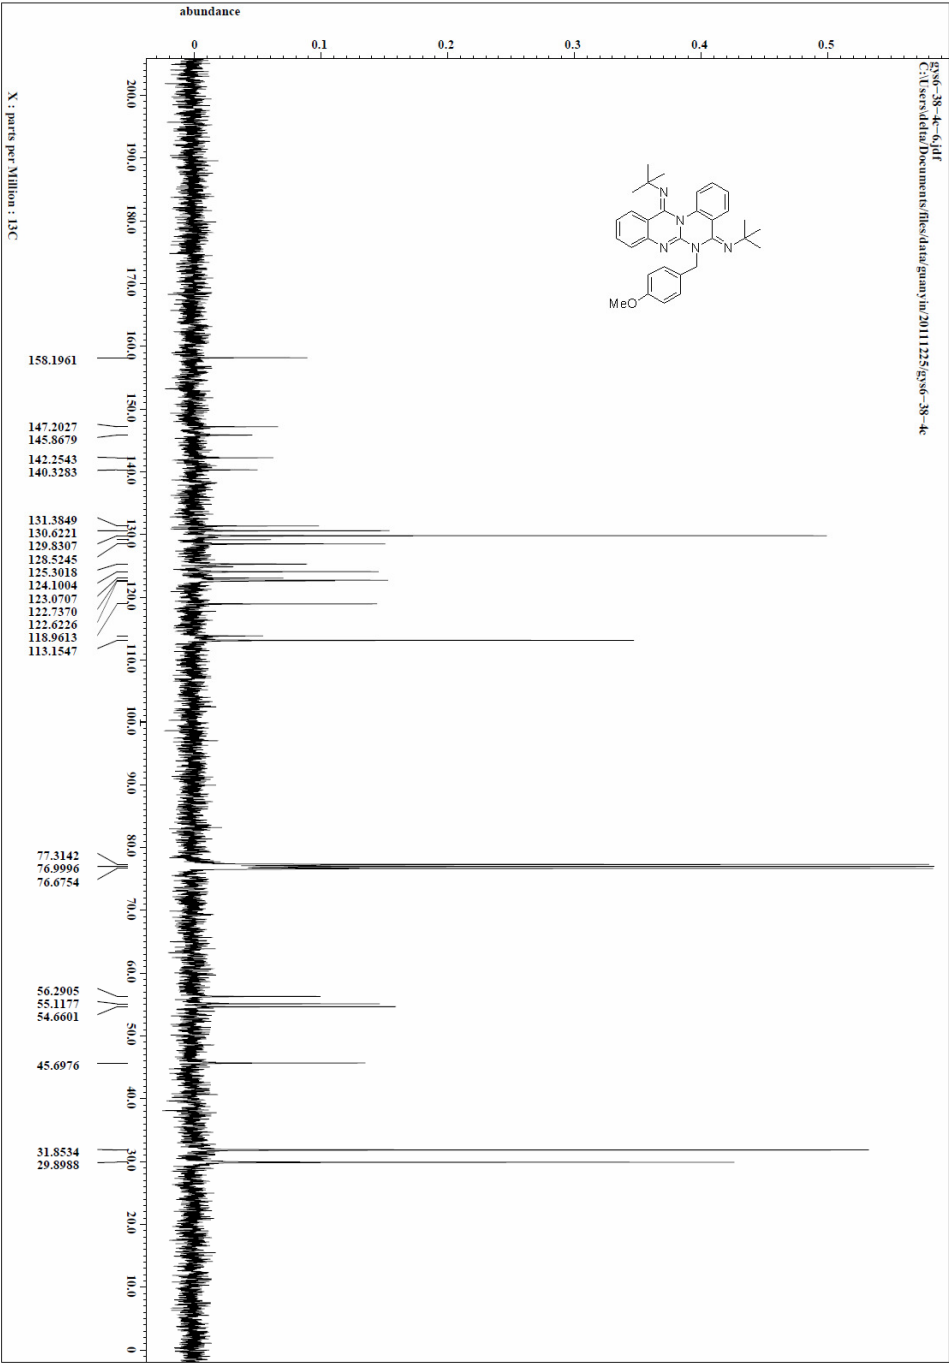



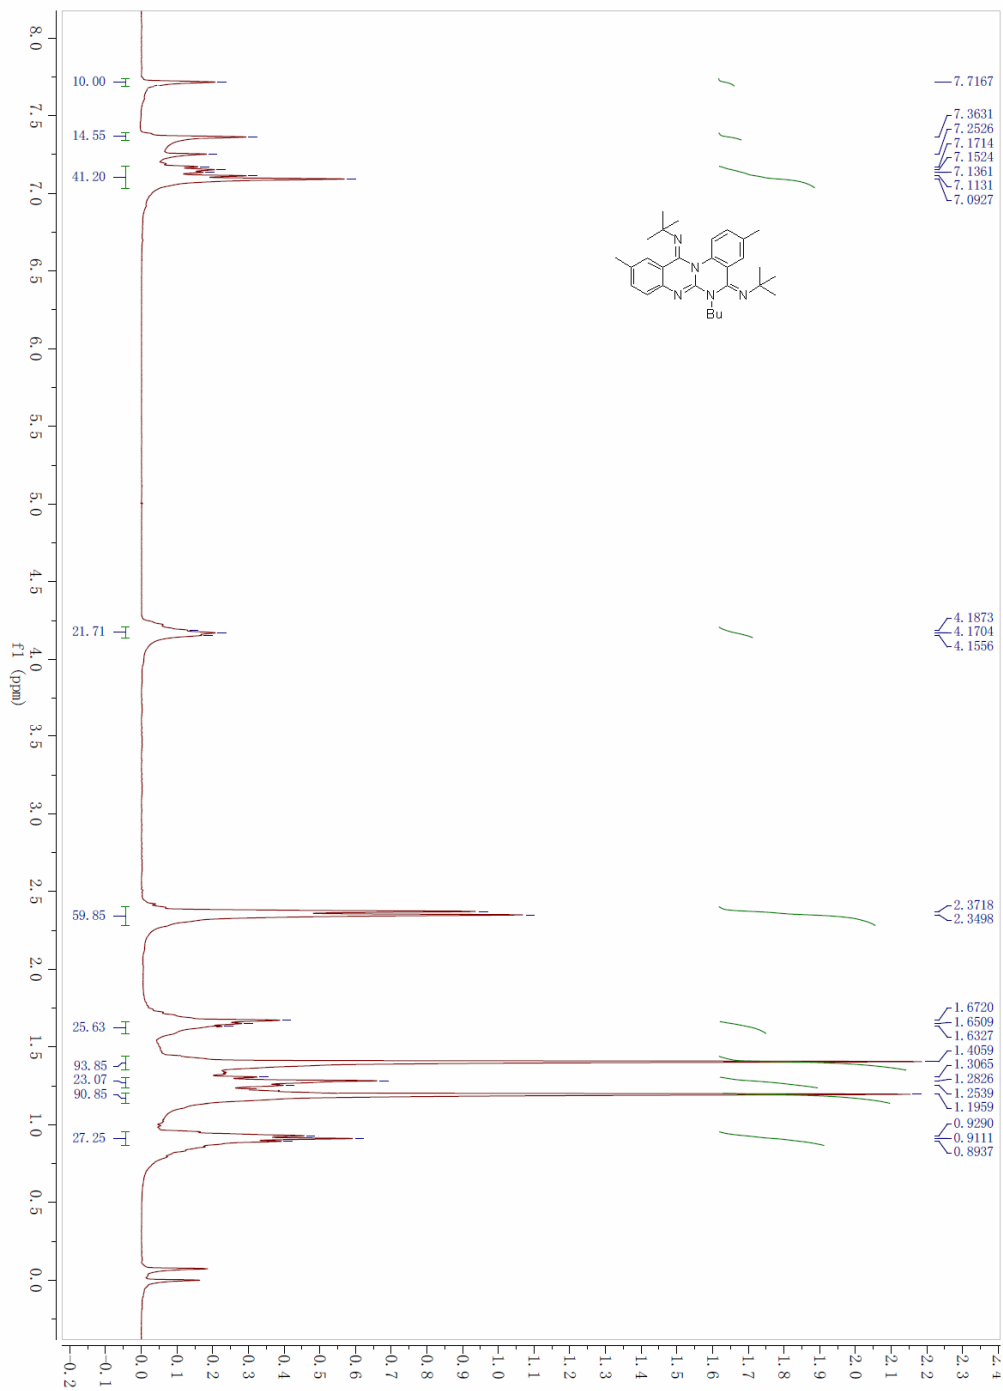



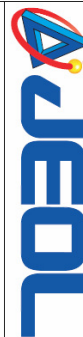



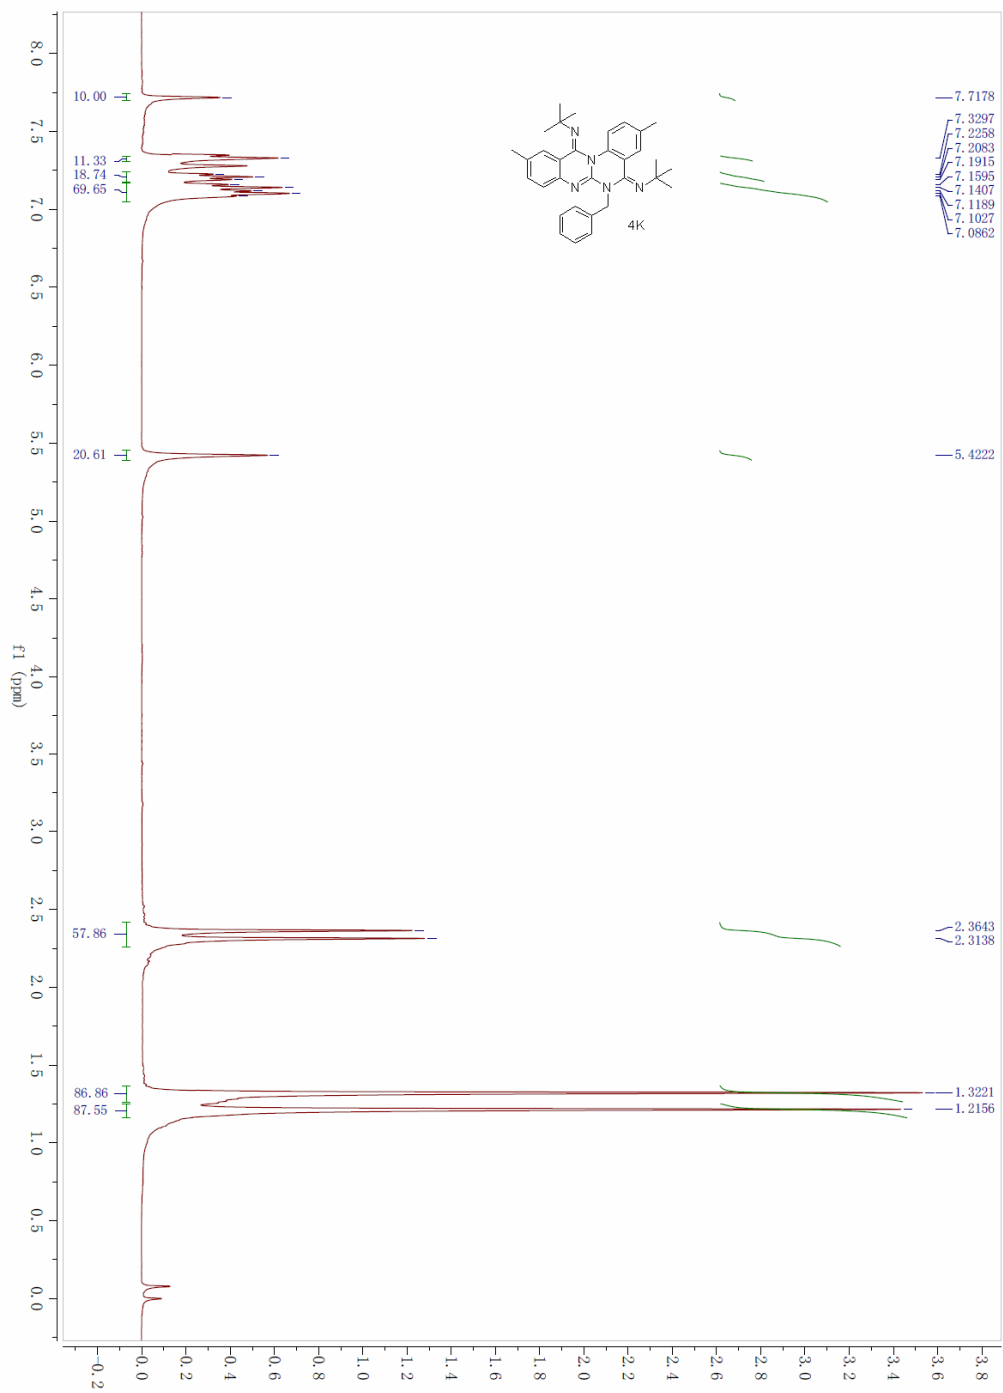



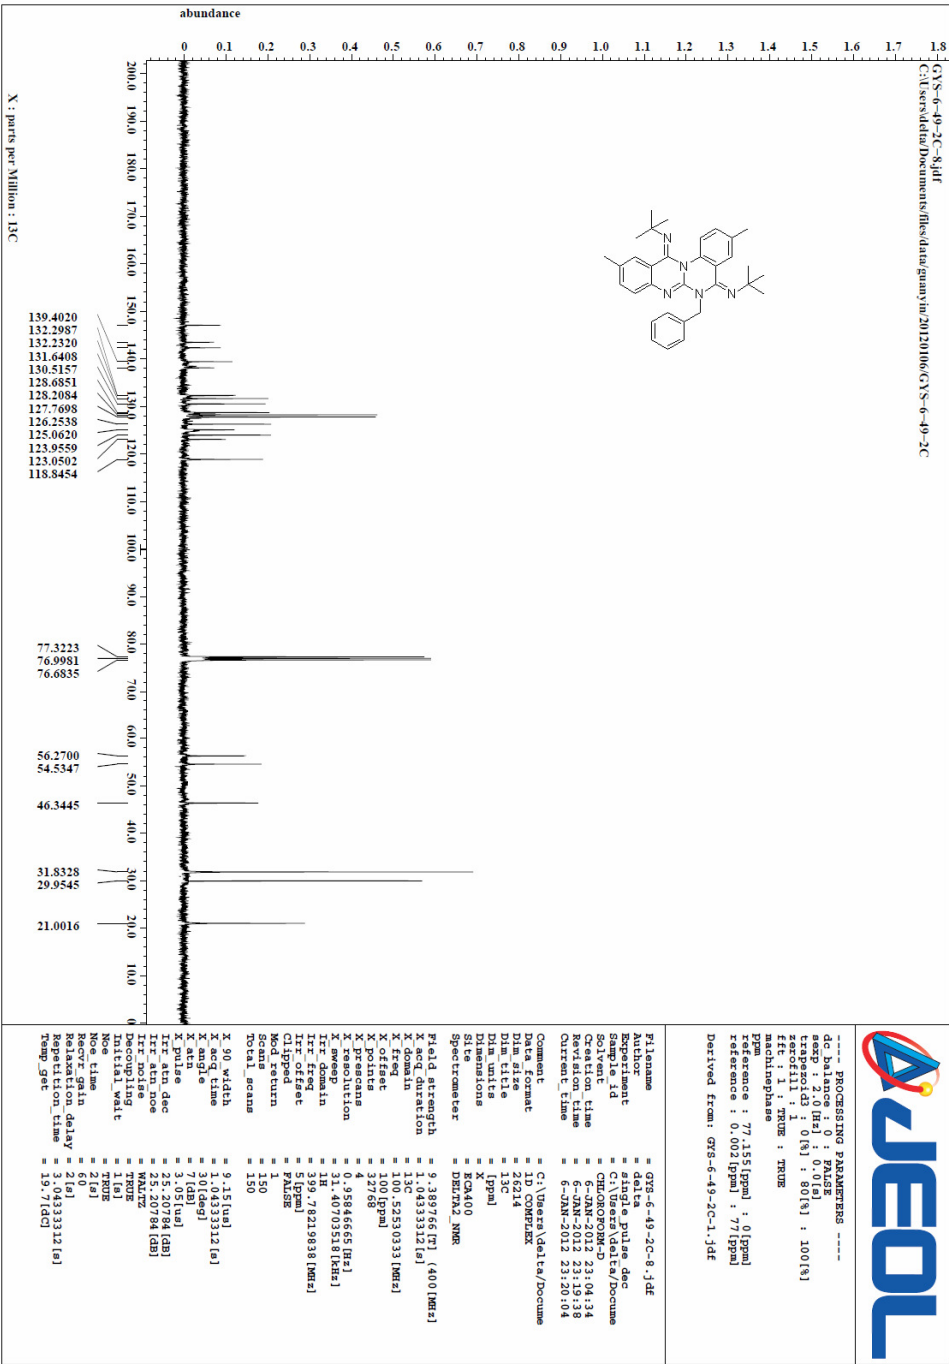



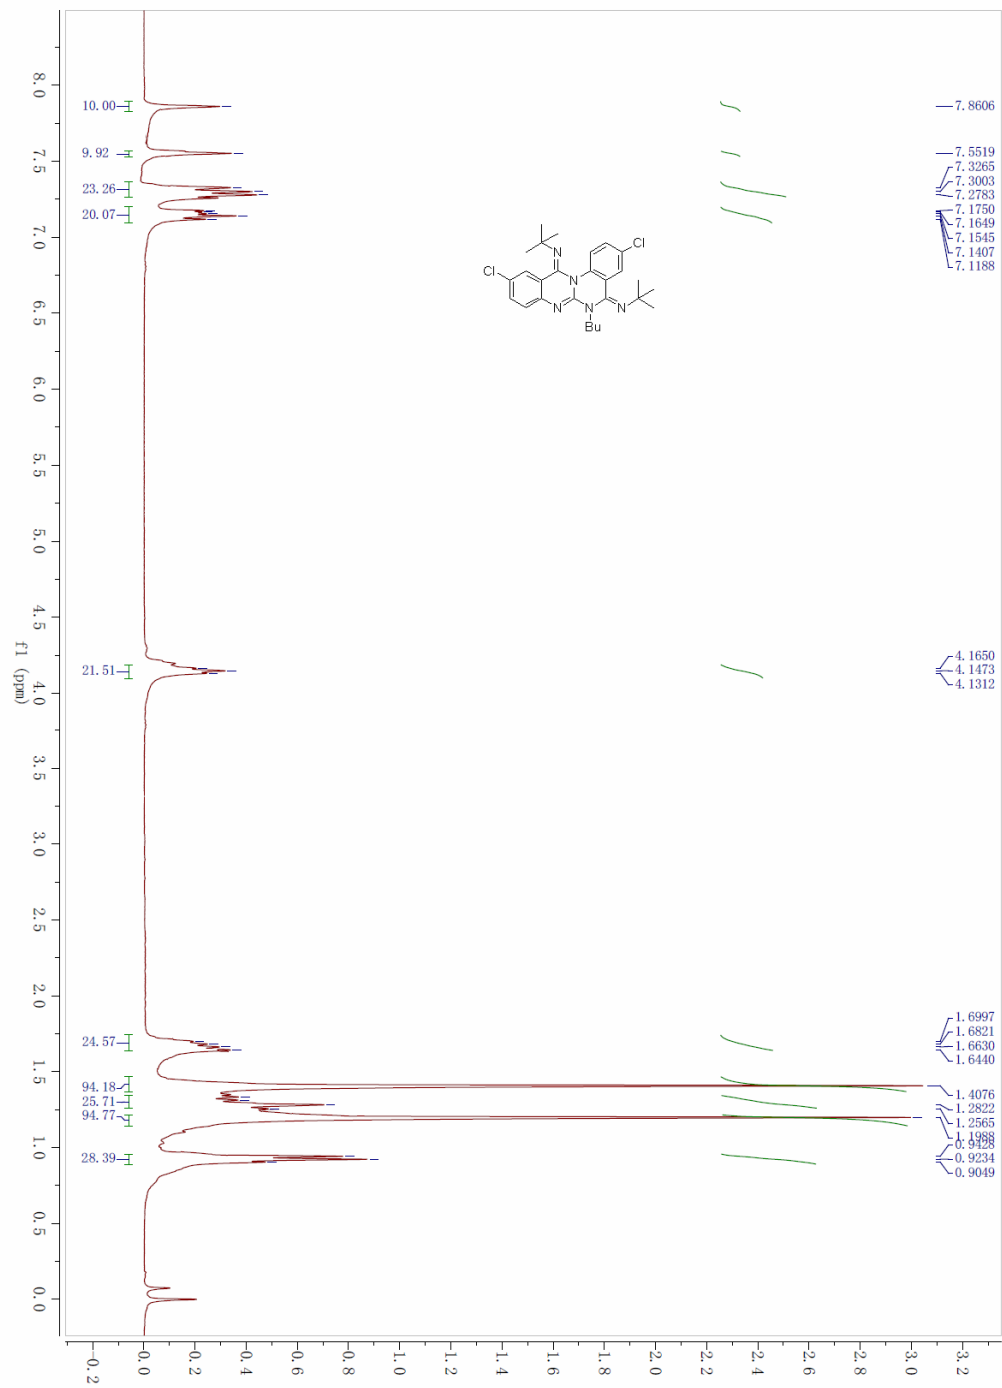



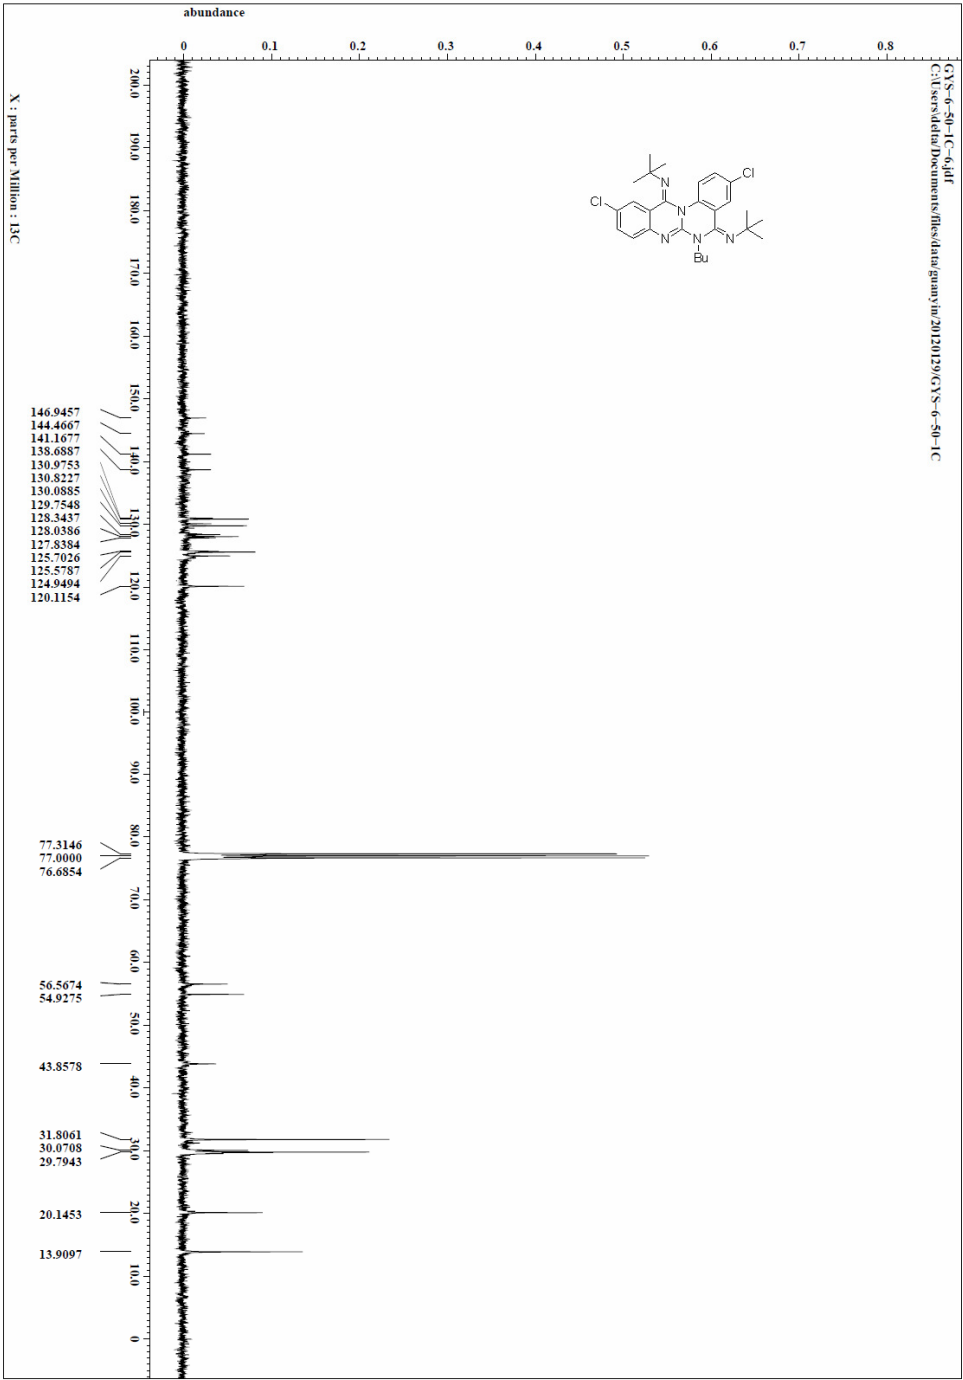



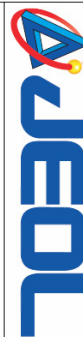







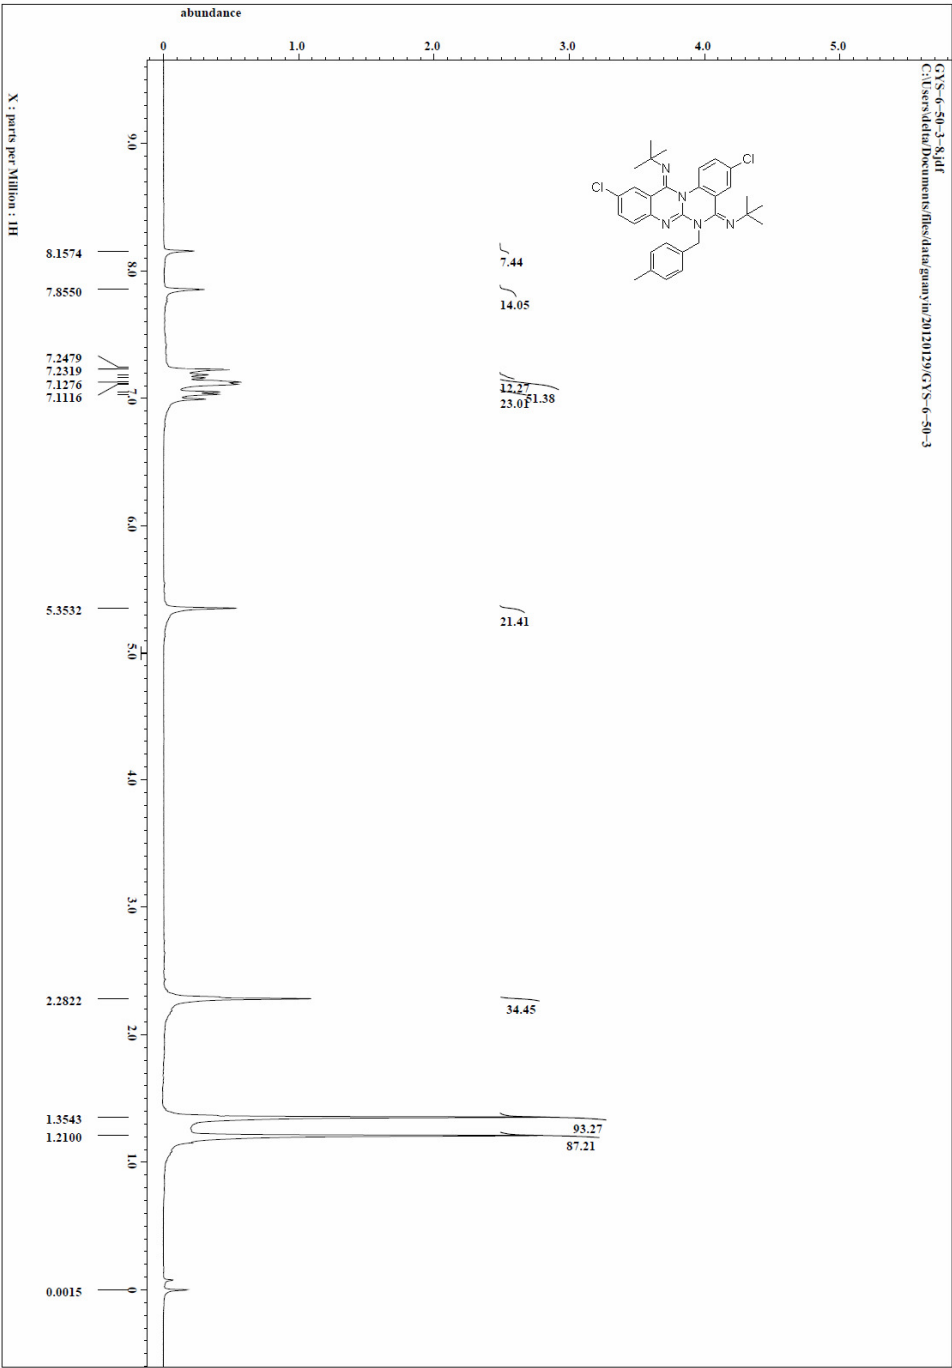



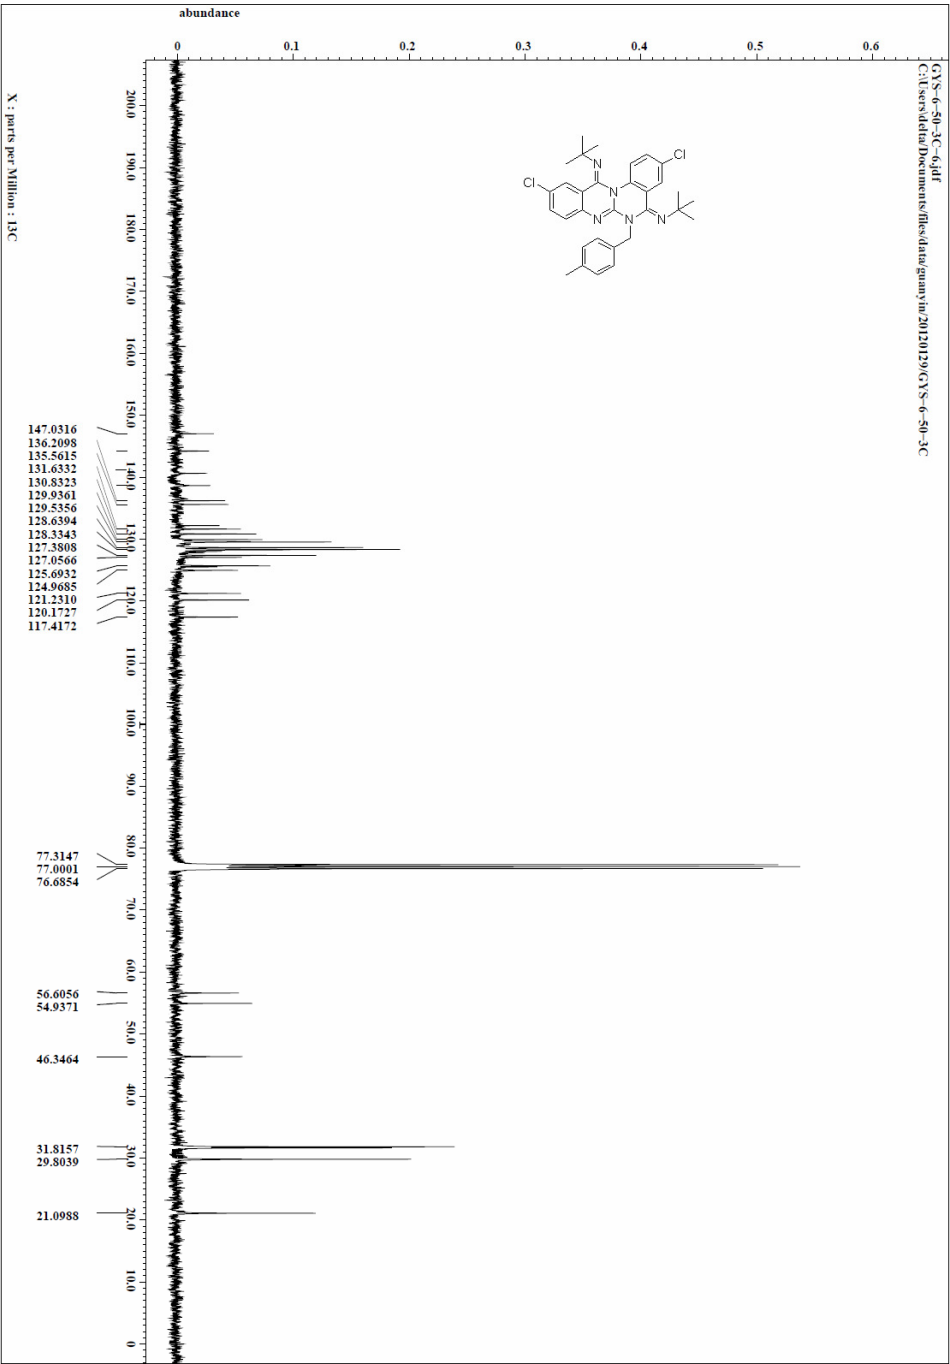



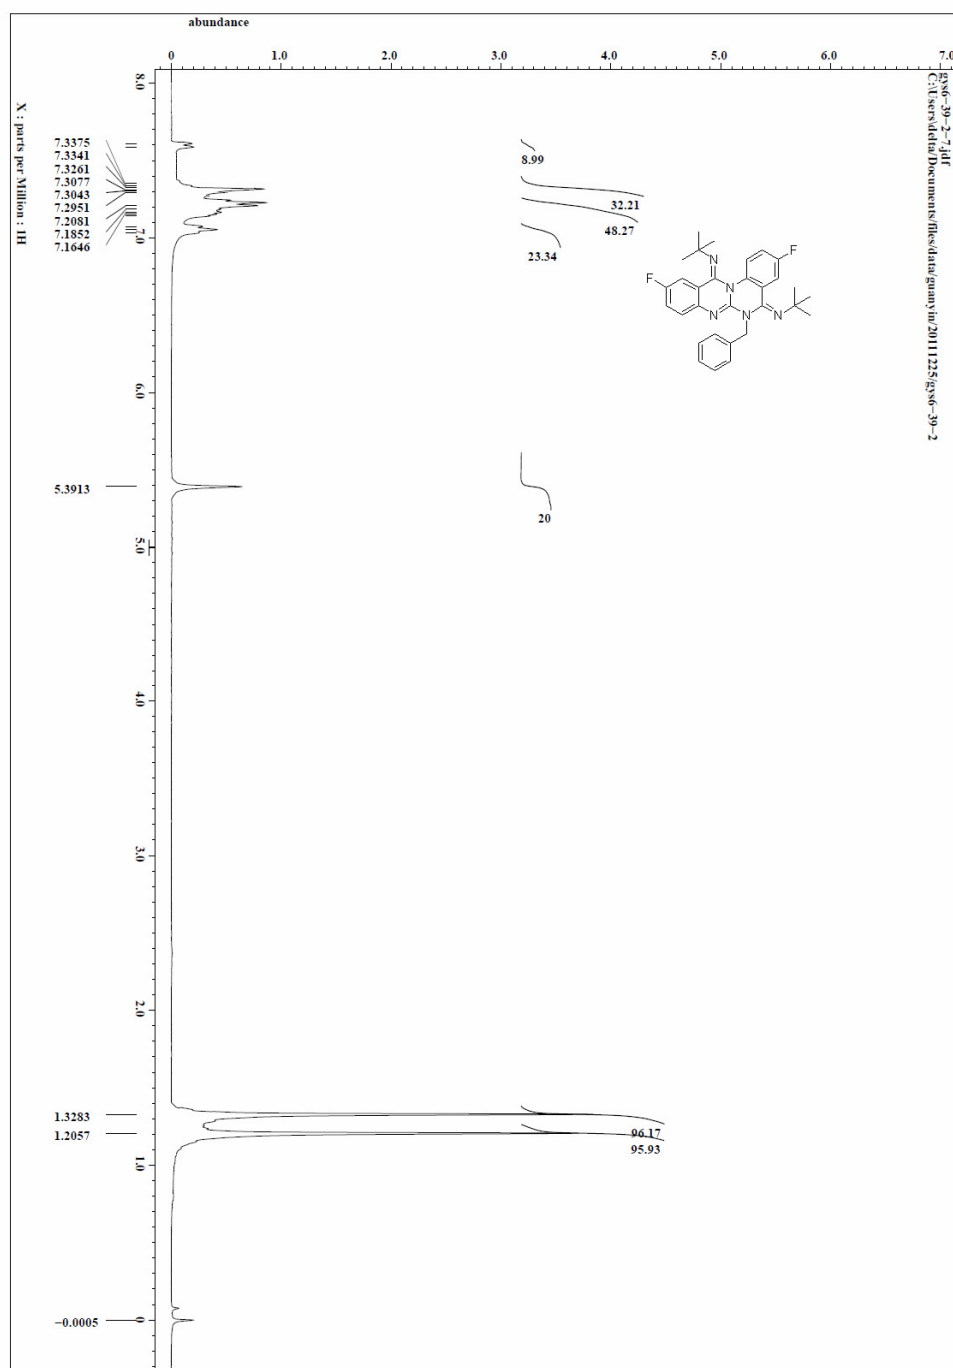



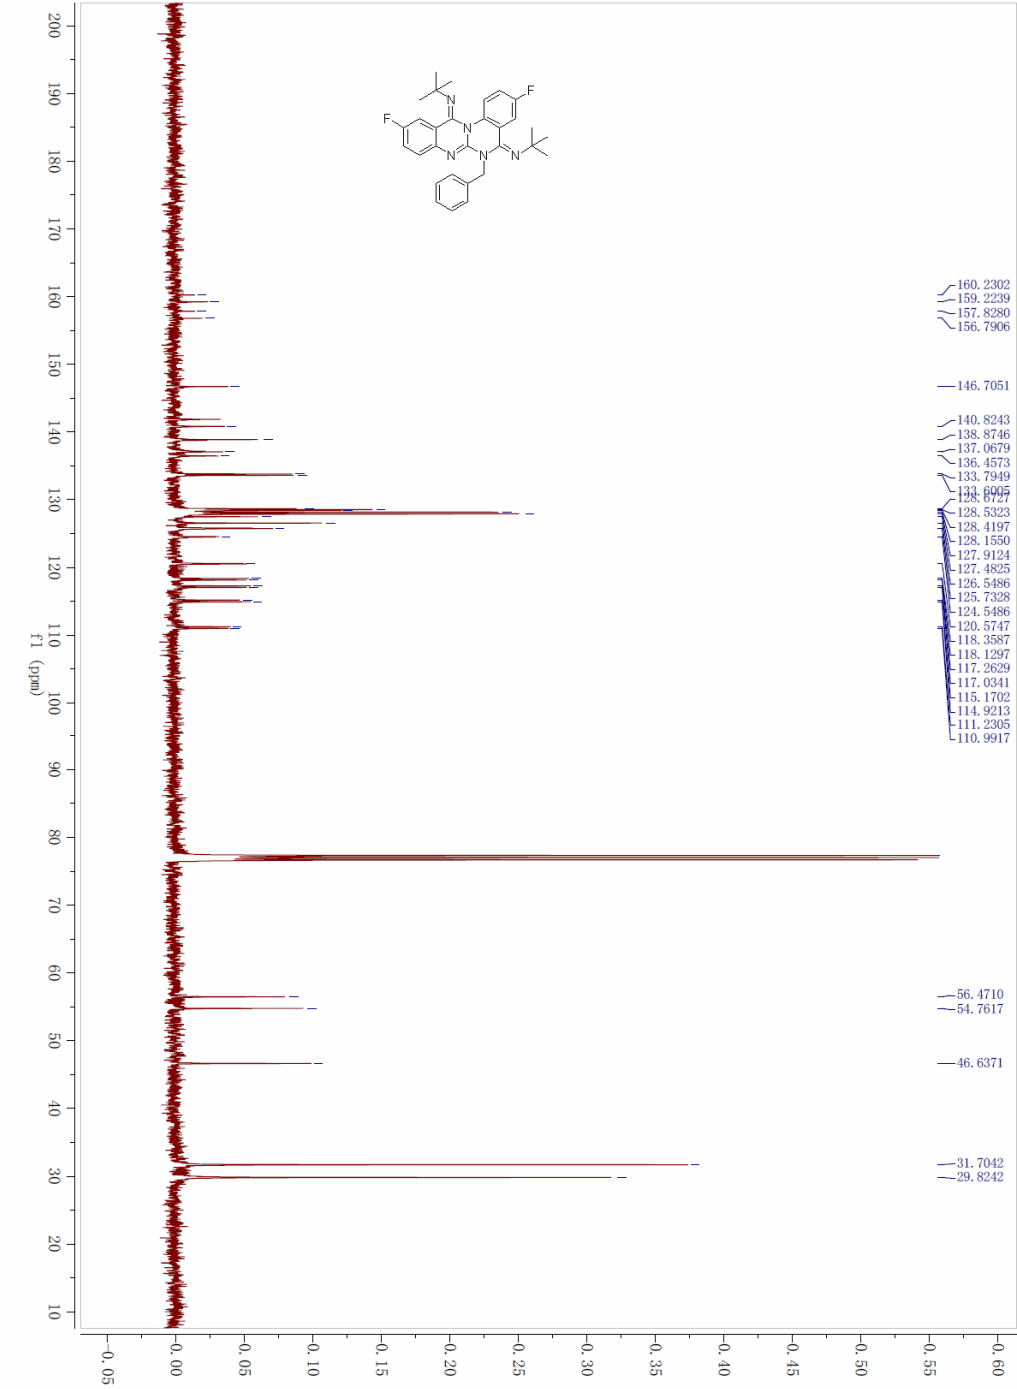



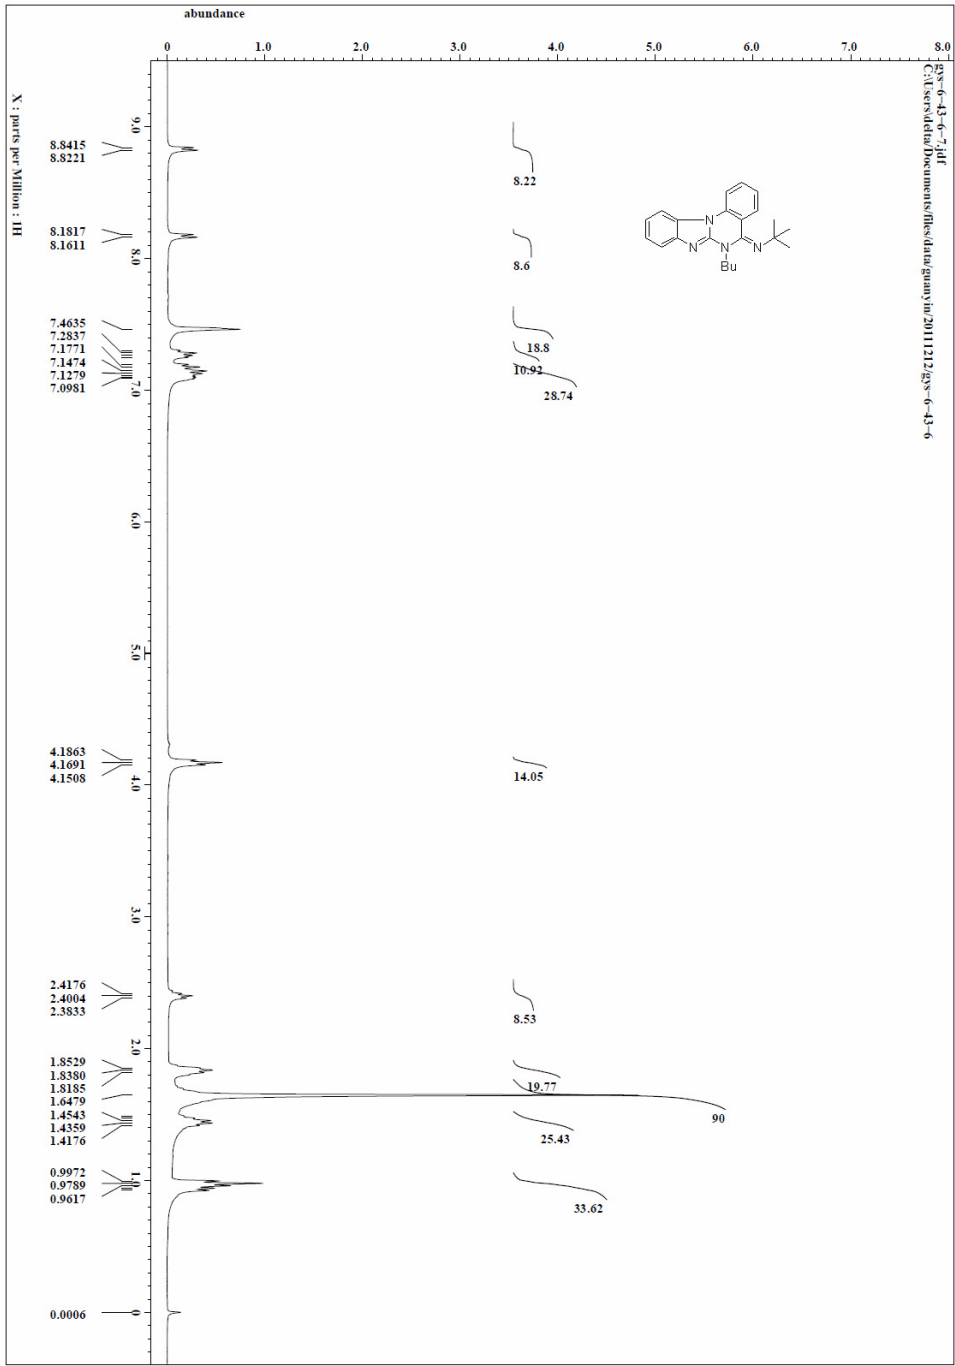



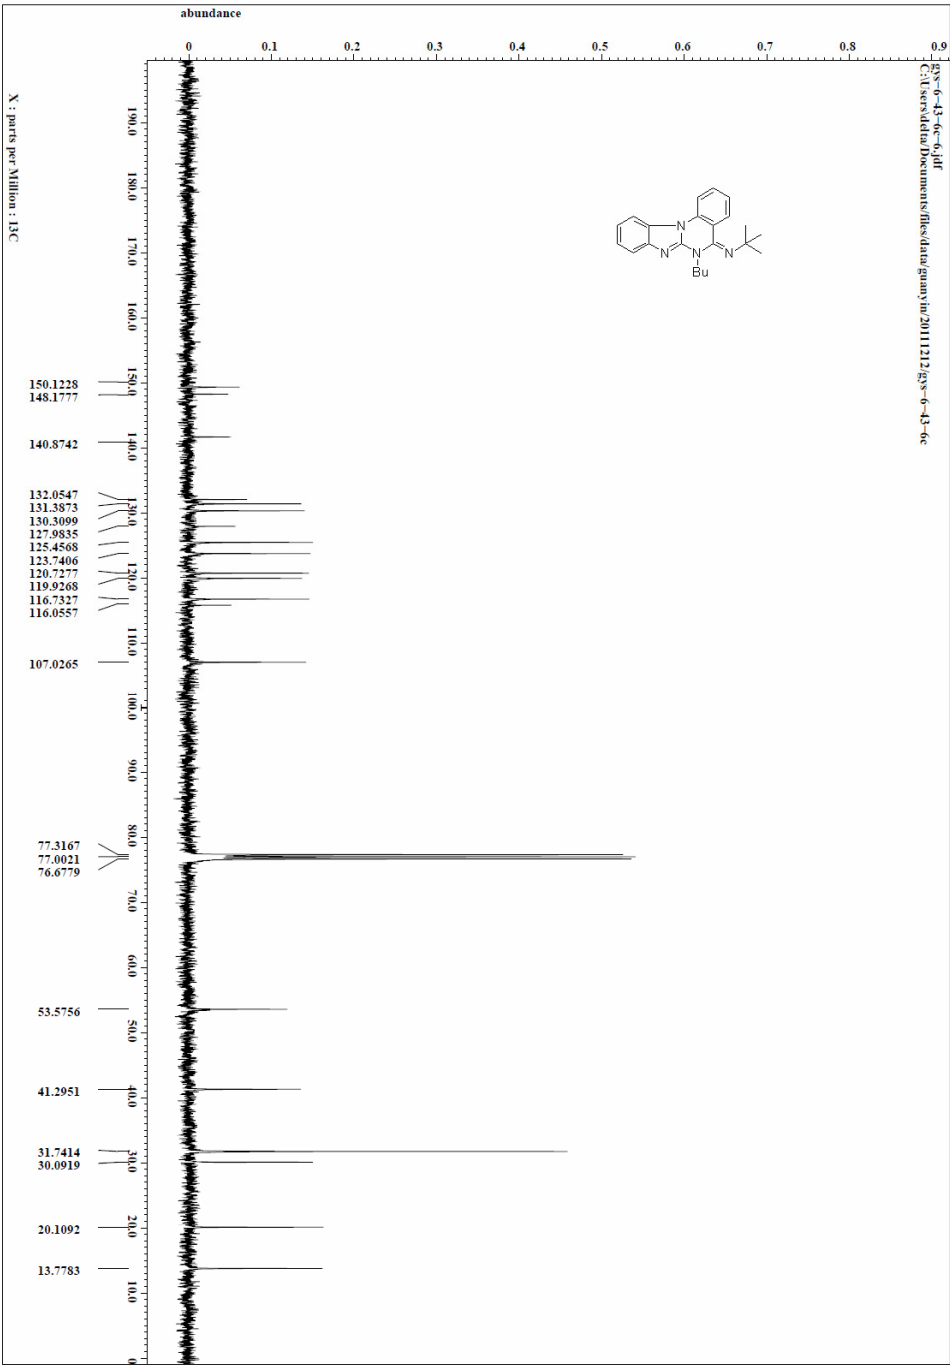



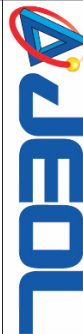



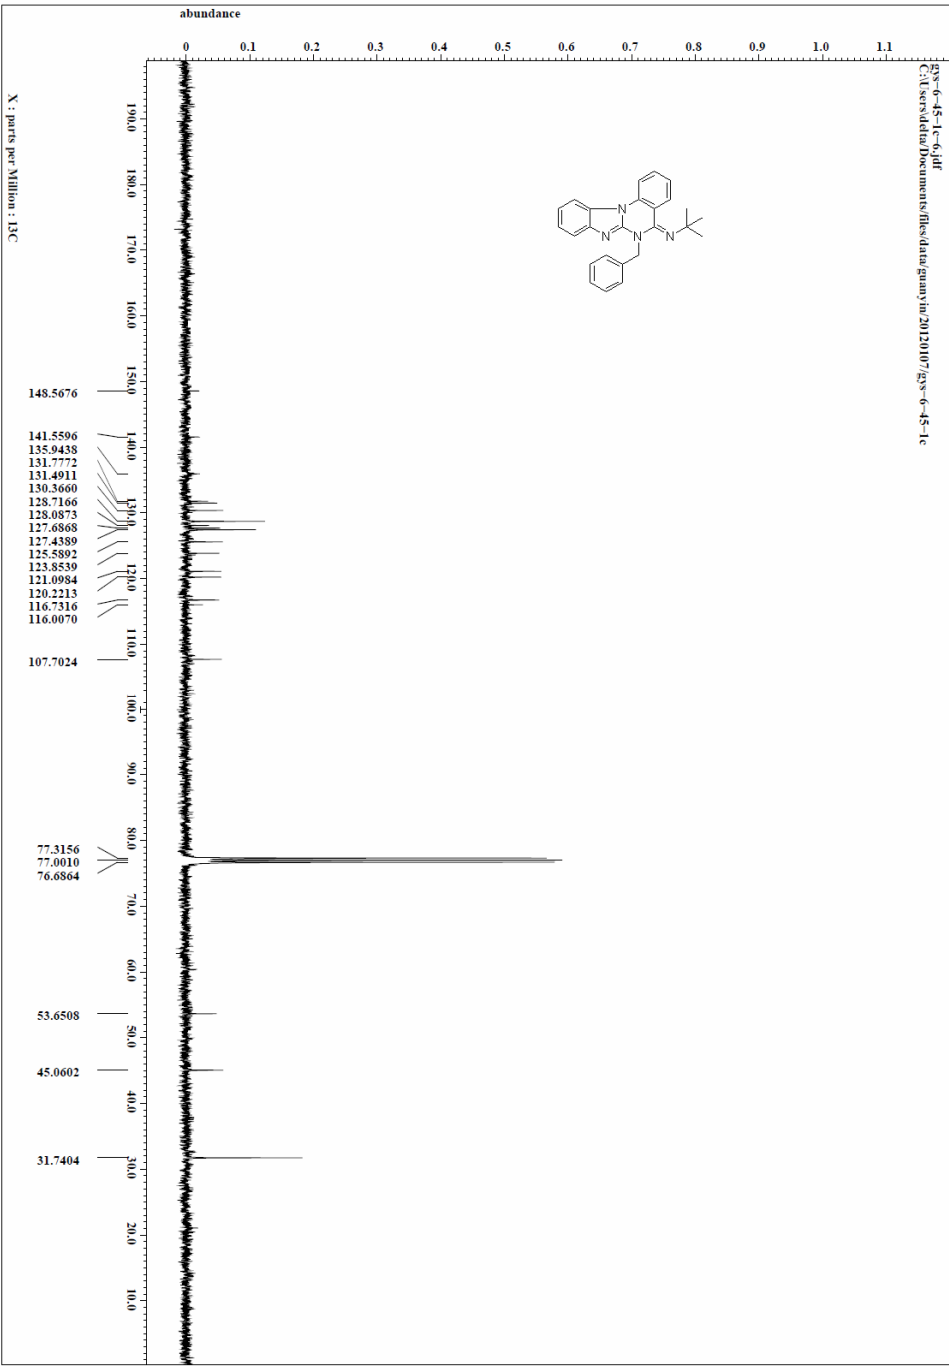



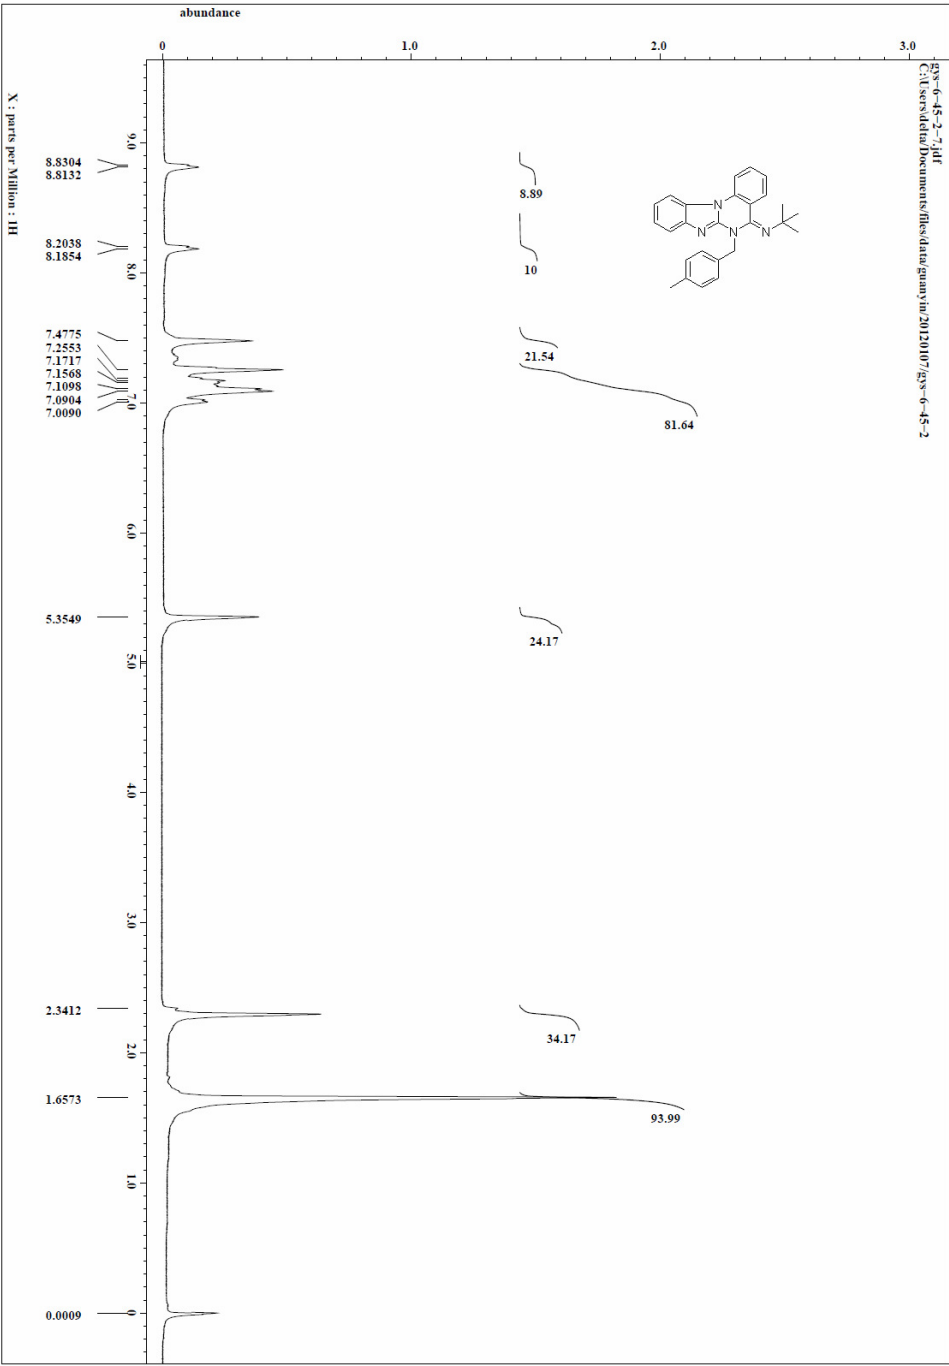



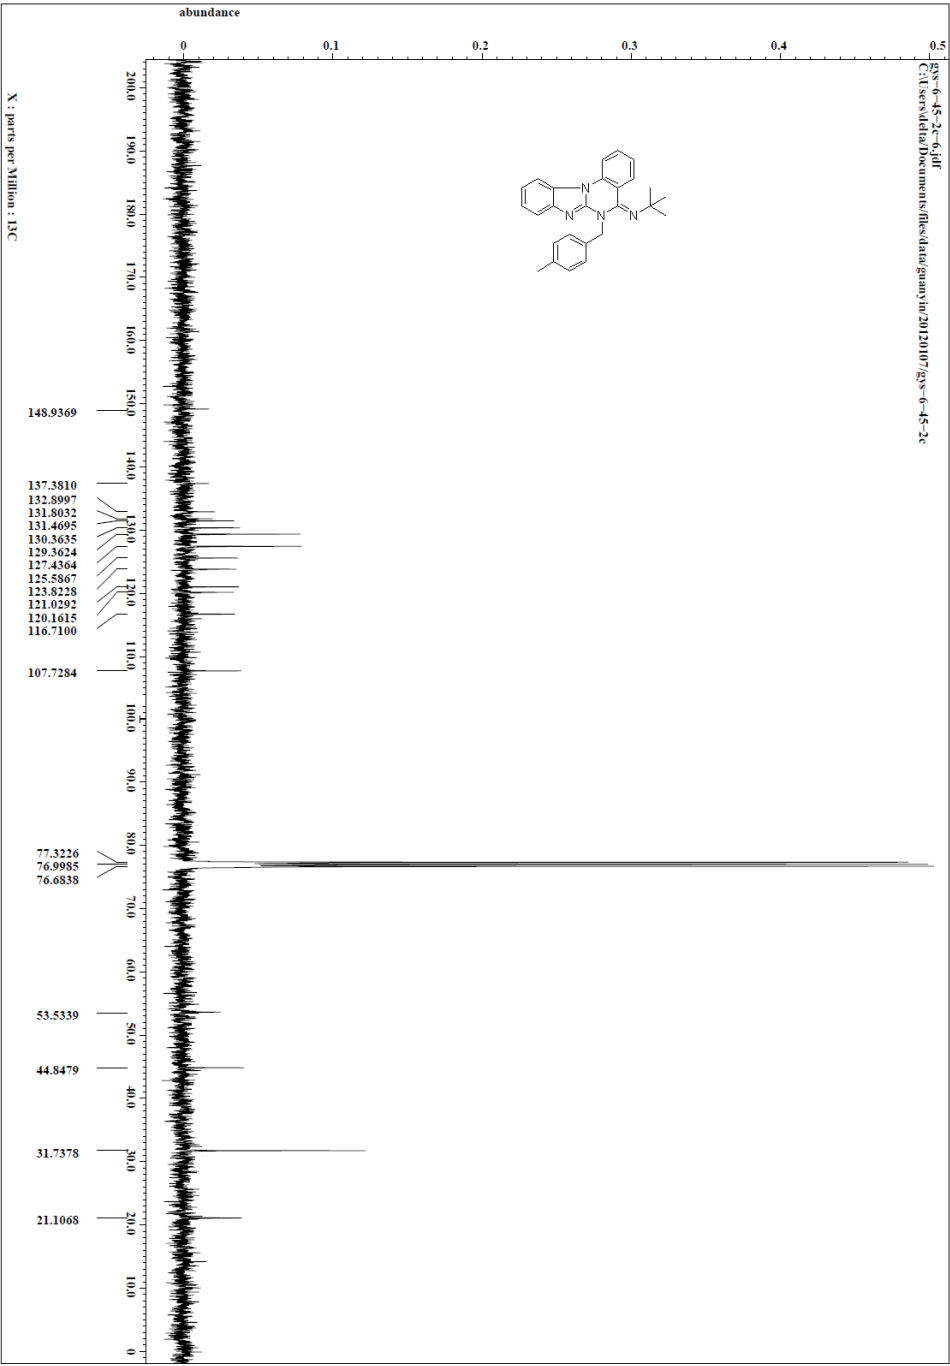

Supplement: c2cc30928a.pdf [file c2cc30928a.pdf]
